# Supplementary material for: Authentication of Herbal Supplements Using Next-Generation Sequencing
Source: PLoS One. 2016 May 26;11(5):e0156426. doi: 10.1371/journal.pone.0156426 (PMC4882080; doi:10.1371/journal.pone.0156426)
Supplement: S2 Table — Read coverage for fungal OTUs. (XLSX) [file pone.0156426.s002.xlsx]

## Sheet: Fungi_coverage
					Supplement / Buffer
					Echinacea-1			Echinacea-2			Echinacea-3			Gingko-7			Gingko-8	Gingko-9			Gingko-9 Enhanced Primer			Hypericum-10			Hypericum-11			Hypericum-12			Trigonella-13	Trigonella-15			Valeriana-4			Valeriana-5			Valeriana-6
Phylum	Order	Family	Genus	species	CTAB	ILB	WHITL	CTAB	ILB	WHITL	CTAB	ILB	WHITL	CTAB	ILB	WHITL	WHITL	CTAB	ILB	WHITL	CTAB	ILB	WHITL	CTAB	ILB	WHITL	CTAB	ILB	WHITL	CTAB	ILB	WHITL	ILB	CTAB	ILB	WHITL	CTAB	ILB	WHITL	CTAB	ILB	WHITL	CTAB	ILB	WHITL
Insertae sedis		Vorticellidae	Vorticella	Vorticella striata															209								152
	Haptorida	Spathidiidae	Apobryophyllum	Apobryophyllum schmidingeri																					199
	Mortierellales	Mortierellaceae	Mortierella	Mortierella cystojenkinii																		287																				176
	Mucorales	Choanephoraceae	Choanephora	Choanephora infundibulifera																											200
		Lichtheimiaceae	Rhizomucor	Rhizomucor pusillus															144								730
				Rhizomucor variabilis																										115
		Mucoraceae	Mucor	Mucor circinelloides																											131													545
				Mucor racemosus																		170
		Rhizopodaceae	Rhizopus	Rhizopus microsporus																					259
				Rhizopus oryzae														663	1180	1227	11532	4907	14648							109													321	178
	Schizopyrenida	Vahlkampfiidae	Allovahlkampfia	Allovahlkampfia sp. PKD 2011b																														138											221
Ascomycota	Botryosphaeriales	Botryosphaeriaceae	Lasiodiplodia	Lasiodiplodia theobromae																																								330
	Capnodiales	Cladosporiaceae	Cladosporium	Cladosporium oxysporum					578				10352					2726	2252	2775				6518	11972	5628							201	2120				3134		45398				118
				Cladosporium sp. 2 BRM-2015														105
				Cladosporium sp. M2077																							1164		1202
				Cladosporium sp. YNC2.5-120506																					129
				Cladosporium tenuissimum																							1451		3435	1573	990	1067			1782	1657							3386	2024	3081
			Rachicladosporium	Rachicladosporium pini																				686
		Mycosphaerellaceae	Cercospora	Cercospora sp. PG2															107																								373
			Mycosphaerella	Mycosphaerella coffeicola																							1793
				Mycosphaerella sp. Ponipodef 06														711	629	848
			Pseudocercospora	Pseudocercospora sp. FBR-2013														6760	7175	8670
			Ramularia	Ramularia collo-cygni																				258
			Septoria	Septoria arundinacea																				341
				Septoria tormentillae	132	176	328
	Chaetothyriales	Cyphellophoraceae	Cyphellophora	Cyphellophora sp. JX1210																							610
		Herpotrichiellaceae	Phialophora	Phialophora sp. TR076																																				1367
	Diaporthales	Diaporthaceae	Diaporthe	Diaporthe caulivora				2996	1585	1470				691	2748
				Diaporthe longicolla				1505	349							208
				Diaporthe sp. XZ-07														122
		Gnomoniaceae	Discula	Discula destructiva																																		479
		Valsaceae	Phomopsis	Phomopsis emicis																					118
	Eurotiales	Aspergillaceae	Aspergillus	Aspergillus amstelodami		787												878	1012	473	1173	950	136							1678	1492	2332		1786	1239	1464							1655	3066	2646
				Aspergillus candidus																																159
				Aspergillus flavus														1180	918	1250	24944	17175	26409							1812	742	5702		1622	705	1293							548	547	741
				Aspergillus fumigatus														577	469	702																					5287
				Aspergillus nidulans															120	237
				Aspergillus ochraceus														276	152	248
				Aspergillus osmophilus														526	609	478
				Aspergillus penicillioides								228						883	1114	1118					782		3608	1760		183
				Aspergillus quadrilineatus														171
				Aspergillus ruber																									137
				Aspergillus sp. 6-18p											256												271		928																183
				Aspergillus sp. F9																																									114
				Aspergillus sp. IMI 381727														917	1241	1047			126
				Aspergillus sp. KACC 47316																							673	153	108
				Aspergillus sp. M1071																												312
				Aspergillus sp. M1151																				362
				Aspergillus sp. SL-7																							483
				Aspergillus tamarii																	108	836	10676
				Aspergillus tubingensis									1453					354	486	380				156
				Aspergillus versicolor														642	304	687							1093	1277															100
			Eurotium	Eurotium tonophilum															150	122	451						126
			Penicillium	Penicillium commune																																		1666
				Penicillium crustosum																																					717
				Penicillium italicum						155										132							474																		129
				Penicillium pusillum					170
				Penicillium sp. Dzf6																																							105
				Penicillium sp. PSF36																					417
				Penicillium urticae						206
			Xeromyces	Xeromyces bisporus														1078	673	1233			3388
		Trichocomaceae	Thermomyces	Thermomyces lanuginosus														978	783	846																								197
	Glomerellales	Glomerellaceae	Colletotrichum	Colletotrichum lagenaria														4369	5433	5870
				Colletotrichum sp. TNOS1														388	354	206
				Colletotrichum trifolii																							260
				Colletotrichum truncatum															255	123
		Plectosphaerellaceae	Acremonium	Acremonium alcalophilum																	3993	141
			Acrostalagmus	Acrostalagmus luteoalbus																			215
			Gibellulopsis	Gibellulopsis sp. YH-2012		129
			Plectosphaerella	Plectosphaerella cucumerina	254	439	180													113																	423		728			5575
				Plectosphaerella sp. E10512b	223	240	133																																2090
			Verticillium	Verticillium dahliae		102
	Helotiales	Helotiaceae	Ascocoryne	Ascocoryne sarcoides																				305
		Sclerotiniaceae	Sclerotinia	Sclerotinia sclerotiorum				1580	3360	3412
	Hypocreales	Bionectriaceae	Clonostachys	Clonostachys sp. Ec0501														132												315	825	497		229	407								626	311	650
		Hypocreaceae	Trichoderma	Trichoderma atroviride								205
				Trichoderma reesei																																				1958
		Nectriaceae	Fusarium	Fusarium armeniacum																																							222	196	516
				Fusarium chlamydosporum																												1522											758	895	704
				Fusarium culmorum						1026																				685	318			446	359	305									158
				Fusarium equiseti										353	101			1638	1511	1796					121						22277	32875		5121	7659	3521							18115	22691	21353
				Fusarium lateritium														1554	871	1231
				Fusarium napiforme															109								258			161				534	635	358							1947	1384	2579
				Fusarium oxysporum					564									105		131				720	103	1281
				Fusarium proliferatum																							38015			997	1753	467			329	222								795	643
				Fusarium sp. LD-101															250
				Fusarium sp. NSC-12																										1091	1809					131
				Fusarium sporotrichioides					270	285														602	143
				Fusarium subglutinans																											436
				Fusarium tricinctum					1308	407					199
				Fusarium verticillioides																												1132											755
			Fusidium	Fusidium sp. INBio2924G														7396	4769	6089
			Stephanonectria	Stephanonectria keithii														146
			Volutella	Volutella ciliata																																			2329
		Ophiocordycipitaceae	Haptocillium	Haptocillium balanoides																				113
	Magnaporthales	Magnaporthaceae	Gaeumannomyces	Gaeumannomyces graminis																														144	242	131
			Magnaporthe	Magnaporthe grisea																														144
	Microascales	Halosphaeriaceae	Periconia	Periconia byssoides														110		112
	Onygenales	Ajellomycetaceae	Emmonsia	Emmonsia parva														150		110							185
		Gymnoascaceae	Gymnascella	Gymnascella aurantiaca															116
			Gymnoascus	Gymnoascus sp. NZ-2015c														3710	4839	3804	1301
	Orbiliales	Orbiliaceae	Arthrobotrys	Arthrobotrys foliicola																										132	279	120		2167	1440	1195
	Pezizales	Ascodesmidaceae	Cephaliophora	Cephaliophora tropica														437	1354	340	10889	11584	109
		Sarcosomataceae		Sarcosomataceae sp. GSH2_9																		112
			Plectania	Plectania milleri																	172	102
	Pleosporales	Arthopyreniaceae		Arthopyreniaceae sp. GMG_P1																			491
		Corynesporascaceae	Corynespora	Corynespora cassiicola																		3228
		Didymellaceae	Didymella	Didymella applanata									2979					553	600	819	2634	5566	1961
				Didymella exitialis	173	160	368
				Didymella sp. EXMY-7																					193
			Leptosphaerulina	Leptosphaerulina trifolii																																		1457
			Peyronellaea	Peyronellaea glomerata																		6520
				Peyronellaea sp. NRRL 62785																															2555	3185
			Phoma	Phoma betae																	214
				Phoma eupyrena																																		248
				Phoma medicaginis							15269																												3271
				Phoma sp. ADL-2593-04																					135
				Phoma sp. Po-fs17																					404
				Phoma sp. Zo-Laiwu																	2574
			Stagonosporopsis	Stagonosporopsis cucurbitacearum																	1565																		3071
		Didymosphaeriaceae		Montagnulaceae sp. HB28E																	169
				Montagnulaceae sp. I SMR-2011																														100
			Paraconiothyrium	Paraconiothyrium brasiliense																	148
			Paraphaeosphaeria	Paraphaeosphaeria minitans						106
		Leptosphaeriaceae	Ampelomyces	Ampelomyces quisqualis							2937						3542		140		9071	2977								23266	21926	26983											785	849	1079
				Ampelomyces sp. HMLAC216																																					6441
				Ampelomyces sp. LK-2010																					130
				Ampelomyces sp. MosID11			123
			Leptosphaeria	Leptosphaeria sp. LF35																												114		1560										175	103
				Leptosphaeria sp. OUCMBIII091047																															1310									328
				Leptosphaeria sp. SL14																														2408		253
				Leptosphaeria sp. XJ12																										127	125				1076	1185
		Massarinaceae	Stagonospora	Stagonospora pseudopaludosa																							233
		Phaeosphaeriaceae		Phaeosphaeriaceae sp. SFSt5																										977	1080			927	800	970							2161	3038	3355
			Chaetosphaeronema	Chaetosphaeronema sp. PHY-55																					240
			Parastagonospora	Parastagonospora avenae																					308	4264
			Phaeosphaeria	Phaeosphaeria caricicola																																									189
				Phaeosphaeria podocarpi																																									153
				Phaeosphaeria sp. TMS-2011																		6061
				Phaeosphaeria sp. XJ25																	327													2896	2075	2305							339		215
			Phaeosphaeriopsis	Phaeosphaeriopsis sp. CBP21E																										6576	8993	7340		901	1055	1506							9451	10796	8456
				Phaeosphaeriopsis sp. PHY-22																														244
			Setophoma	Setophoma vernoniae																										112				2529	882	2127
		Pleosporaceae		Pleosporaceae sp. bc_besc_42e																																				6598
				Pleosporaceae sp. N50																														245									366	111
			Alternaria	Alternaria brassicae																															158
				Alternaria gaisen																	1371															309								234
				Alternaria infectoria																				326
				Alternaria longissima																										7216	11199	9764		11687	9744	9939							24161	33054	29706
				Alternaria solani	197	799	552
				Alternaria sp. CID305			720																			1002																		110
				Alternaria sp. CID704																				651	429																5406
				Alternaria sp. CID1043																															129
				Alternaria sp. HL002																														141
				Alternaria sp. Macof 09																	719
				Alternaria sp. MG19																	11162	3838
				Alternaria sp. Utah 2																	112
				Alternaria tenuissima																	239		323												262
			Bipolaris	Bipolaris microlaenae																														136
				Bipolaris setariae																										364	115														142
				Bipolaris sorokiniana																										183															223
				Bipolaris sp. 2 TMS-2011																										171	121	102
				Bipolaris sp. BR479																										10047	7981	7890		604	249	314							8598	6867	7897
				Bipolaris sp. BR487																										546	1457	2850		1158	616								1516	1326	1278
				Bipolaris sp. CCN34																												493
				Bipolaris victoriae																														194	199	325							410	330	173
			Cochliobolus	Cochliobolus sp. CMON42																																366
				Cochliobolus sp. DVRSGPD-1																															1315	853
				Cochliobolus sp. HKB23																											304			120	880	293							359	135	133
				Cochliobolus sp. P18E2																										130				120										959	139
				Cochliobolus sp. wcy01																										18130	3931	3429		2166	3653	2537							6225	7861	6500
			Curvularia	Curvularia eragrostidis																																							752	258	385
				Curvularia hawaiiensis																														177	198	666							352	571	1071
				Curvularia inaequalis																																								106
				Curvularia kusanoi																										164													223
				Curvularia lunata																														659
				Curvularia papendorfii																																								149
				Curvularia sp. CCN35																										17988	22274	16254		3581	2607	4594							12555	18653	17454
				Curvularia sp. SOM.CV.03																												340													396
				Curvularia spicifera																											738			900	922	1738							138	121	128
			Dendryphiella	Dendryphiella sp. BR354																										55291	62573	40328		85788	88798	91439							15418	20691	21699
			Drechslera	Drechslera triseptata																					2008
			Edenia	Edenia gomezpompae																																									127
			Pithomyces	Pithomyces sacchari																																379
			Setosphaeria	Setosphaeria pedicellata																																								136
				Setosphaeria rostrata																														1581
			Stemphylium	Stemphylium sp. CID1374		129																		334	2158
			Ulocladium	Ulocladium sp. FMC1																					112
	Saccharomycetales	Debaryomycetaceae	Candida	Candida albicans																																				8952
			Debaryomyces	Debaryomyces hansenii																					1619		4189	8827	11815
			Hyphopichia	Hyphopichia burtonii																										155	278	186		132										461	323
			Kurtzmaniella	Candida oleophila								4193
			Meyerozyma	Meyerozyma guilliermondii																																								264
			Millerozyma	Millerozyma farinosa																																									106
		Dipodascaceae	Dipodascus	Dipodascus australiensis					1095
			Galactomyces	Galactomyces candidum																					2515
			Geotrichum	Geotrichum sp. olrim943																					7286
				Geotrichum sp. Po67																195							2342
		Metschnikowiaceae	Clavispora	Clavispora lusitaniae																							400
		Phaffomycetaceae	Cyberlindnera	Cyberlindnera fabianii																121							12848	21521															236
			Wickerhamomyces	Wickerhamomyces anomalus																											359	156													128
		Pichiaceae	Ogataea	Candida boidinii																									3511
			Pichia	Pichia kudriavzevii																		124	2741							1045	1121	157
				Pichia myanmarensis							1134	2850
				Pichia sp. GY16S05									3675
				Pichia sp. KCY-5																										143	290
		Saccharomycetaceae	Kazachstania	Candida humilis									962																	424	386
				Kazachstania bulderi							486	2848																		406	538	113
			Saccharomyces	Saccharomyces cerevisiae					507								4284																						4949		3175	820
		Trichomonascaceae	Trichomonascus	Trichomonascus ciferrii							4360		2979
	Sordariales	Chaetomiaceae	Chaetomium	Chaetomium grande														210	318	152
		Sordariaceae	Neurospora	Neurospora intermedia														4004	6682	3743
	Trichosphaeriales	Trichosphaeriaceae	Nigrospora	Nigrospora oryzae								27980																						221	203	254							159
				Nigrospora sp. GS4_1_3																																									105
	Xylariales	Amphisphaeriaceae	Adisciso	Adisciso tricellulare									868
			Neopestalotiopsis	Neopestalotiopsis clavispora														318	341	269
			Pestalotiopsis	Pestalotiopsis mangiferae																134
				Pestalotiopsis microspora														115
			Seimatosporium	Seimatosporium pistaciae																				315	603
			Truncatella	Truncatella restionacearum																					104
		Apiosporaceae	Arthrinium	Arthrinium pterospermum																							412
		Diatrypaceae	Eutypa	Eutypa sp. CrP16												2981
			Eutypella	Eutypella vitis																																				7533
		Xylariaceae	Nodulisporium	Nodulisporium sp. Et0502														131		114																									197
			Podosordaria	Podosordaria muli														901	747	822
			Rosellinia	Rosellinia limonispora																			262
Basidiomycota	Agaricales	Pleurotaceae	Pleurotus	Pleurotus columbinus																							236
		Psathyrellaceae		Coprinus cordisporus															161
			Coprinopsis	Coprinopsis cinerea														290	870	466
	Boletales	Boletaceae	Xerocomellus	Xerocomellus cisalpinus																																					366
	Cantharellales	Ceratobasidiaceae	Rhizoctonia	Rhizoctonia solani																																				8417
			Thanatephorus	Thanatephorus cucumeris				1155
	Corticiales	Corticiaceae	Schizopora	Schizopora cf. radula DLL2009-049																				4313
	Cystofilobasidiales	Cystofilobasidiaceae	Cystofilobasidium	Cystofilobasidium macerans																				175
	Erythrobasidiales	Erythrobasidiaceae	Erythrobasidium	Erythrobasidium hasegawianum														140	156	120
			Sakaguchia	Sakaguchia dacryoidea					259
	Filobasidiales	Filobasidiaceae	Filobasidium	Filobasidium uniguttulatum																								1244
	Hymenochaetales	Hymenochaetaceae	Hymenochaete	Hymenochaete tropica								5140
			Phellinus	Phellinus pectinatus				3158	2925	2356																	3623	2316		1168				3653	2192	584								608	1107
	Moniliellales	Moniliellaceae	Moniliella	Moniliella megachiliensis																																							115
	Phallales	Phallaceae	Phallus	Phallus hadriani															177
	Polyporales	Coriolaceae	Trametes	Trametes hirsuta							895
		Meruliaceae	Bjerkandera	Bjerkandera adusta cf. RG-2014																																				2003
		Phanerochaetaceae	Phanerochaete	Phanerochaete chrysosporium																																				5683
	Tilletiales	Tilletiaceae	Tilletia	Tilletia barclayana																																							128
				Tilletia horrida																														262	437	221
				Tilletia indica													2297
