# Supplementary material for: Authentication of Herbal Supplements Using Next-Generation Sequencing
Source: PLoS One. 2016 May 26;11(5):e0156426. doi: 10.1371/journal.pone.0156426 (PMC4882080; doi:10.1371/journal.pone.0156426)
Supplement: S3 Table — Comparison of ten active components between Ginkgo-7, Ginkgo-8 and Ginkgo-9 supplements. (XLSX) [file pone.0156426.s003.xlsx]

## Sheet: Ginkgo-HPLC-statistics
Name	Cpd	Label	Formula (DB)	Formula (MFG)	Abund	Algorithm	Area	Base Peak	Z Count	File	End	Formula	Height	ID Source	ID Techniques Applied	Ions	Polarity	Max Z	Min Z	Mass	Score	m/z	RT	Start	Width	Diff (Tgt, mDa)	Formula (Tgt)	Diff (Tgt, ppm)	Score (Tgt)	Flag Severity (Tgt)	Mass (Tgt)	Sample Name	Sample Type	Instrument Name	Position	Acq Method	DA Method	IRM Calibration status	Supplement	Replicate
Quercetin-like	1	Cpd 1: C15 H10 O7	C15 H10 O7	C15 H10 O7	587823	Find By Formula	16362524	603.079	1	G7A-neg.d	7.196	C15 H10 O7	3046528	FBF	FBF	4	Negative	1	1	302.043	99.51	301.036	7.105	7.022	0.174	0.22	C15 H10 O7	0.74	99.51	Pass	302.043	G7A-neg	Sample	Instrument 1	P1-C1	Metabol1_MS-neg-50mm-poroshel.m	Ginkgo.m	Success	Ginkgo-7	A
Quercetrin-like	2	Cpd 2: C21 H20 O11	C21 H20 O11	C21 H20 O11	37513	Find By Formula	873239	301.036	1	G7A-neg.d	5.969	C21 H20 O11	265905	FBF	FBF	4	Negative	1	1	448.101	98.38	447.094	5.903	5.803	0.166	0.54	C21 H20 O11	1.2	98.38	Pass	448.101	G7A-neg	Sample	Instrument 1	P1-C1	Metabol1_MS-neg-50mm-poroshel.m	Ginkgo.m	Success	Ginkgo-7	A
Quercetrin-like	3	Cpd 3: C21 H20 O11	C21 H20 O11	C21 H20 O11	40375	Find By Formula	625094	593.152	1	G7A-neg.d	6.077	C21 H20 O11	225533	FBF	FBF	4	Negative	1	1	448.101	99.5	447.094	6.019	5.969	0.108	0.33	C21 H20 O11	0.74	99.5	Pass	448.101	G7A-neg	Sample	Instrument 1	P1-C1	Metabol1_MS-neg-50mm-poroshel.m	Ginkgo.m	Success	Ginkgo-7	A
Quercetrin-like	4	Cpd 4: C21 H20 O11	C21 H20 O11	C21 H20 O11	36532	Find By Formula	408380	755.184	1	G7A-neg.d	6.268	C21 H20 O11	185831	FBF	FBF	4	Negative	1	1	448.101	98.14	447.094	6.218	6.176	0.091	0.82	C21 H20 O11	1.83	98.14	Pass	448.101	G7A-neg	Sample	Instrument 1	P1-C1	Metabol1_MS-neg-50mm-poroshel.m	Ginkgo.m	Success	Ginkgo-7	A
Kaempferol-like	5	Cpd 5: C15 H10 O6	C15 H10 O6	C15 H10 O6	1950292	Find By Formula	34103527	285.041	1	G7A-neg.d	7.935	C15 H10 O6	8967793	FBF	FBF	4	Negative	1	1	286.048	98.02	285.041	7.86	7.802	0.133	0.55	C15 H10 O6	1.91	98.02	Pass	286.048	G7A-neg	Sample	Instrument 1	P1-C1	Metabol1_MS-neg-50mm-poroshel.m	Ginkgo.m	Success	Ginkgo-7	A
Isorhamnetin-like	6	Cpd 6: C16 H12 O7	C16 H12 O7	C16 H12 O7	259788	Find By Formula	7758399	315.051	1	G7A-neg.d	8.1	C16 H12 O7	1841944	FBF	FBF	4	Negative	1	1	316.059	99.55	315.051	7.968	7.86	0.241	0.3	C16 H12 O7	0.96	99.55	Pass	316.058	G7A-neg	Sample	Instrument 1	P1-C1	Metabol1_MS-neg-50mm-poroshel.m	Ginkgo.m	Success	Ginkgo-7	A
Quercetin-3-beta-glucoside-like	7	Cpd 7: C21 H20 O12	C21 H20 O12	C21 H20 O12	49237	Find By Formula	349890	463.089	1	G7A-neg.d	5.612	C21 H20 O12	177745	FBF	FBF	4	Negative	1	1	464.096	99.26	463.089	5.571	5.538	0.075	0.36	C21 H20 O12	0.77	99.26	Pass	464.096	G7A-neg	Sample	Instrument 1	P1-C1	Metabol1_MS-neg-50mm-poroshel.m	Ginkgo.m	Success	Ginkgo-7	A
Quercetin-3-beta-glucoside-like	8	Cpd 8: C21 H20 O12	C21 H20 O12	C21 H20 O12	25200	Find By Formula	352402	325.093	1	G7A-neg.d	5.812	C21 H20 O12	146344	FBF	FBF	4	Negative	1	1	464.096	99.18	463.089	5.745	5.687	0.124	0.44	C21 H20 O12	0.95	99.18	Pass	464.096	G7A-neg	Sample	Instrument 1	P1-C1	Metabol1_MS-neg-50mm-poroshel.m	Ginkgo.m	Success	Ginkgo-7	A
Rutin-like	9	Cpd 9: C27 H30 O16	C27 H30 O16	C27 H30 O16	249600	Find By Formula	6972757	609.148	1	G7A-neg.d	5.471	C27 H30 O16	2377294	FBF	FBF	5	Negative	1	1	610.155	96.49	609.148	5.397	5.322	0.149	1.44	C27 H30 O16	2.36	96.49	Pass	610.153	G7A-neg	Sample	Instrument 1	P1-C1	Metabol1_MS-neg-50mm-poroshel.m	Ginkgo.m	Success	Ginkgo-7	A
Rutin-like	10	Cpd 10: C27 H30 O16	C27 H30 O16	C27 H30 O16	130686	Find By Formula	3519827	419.229	1	G7A-neg.d	5.753	C27 H30 O16	1267038	FBF	FBF	4	Negative	1	1	610.154	97.96	609.147	5.679	5.579	0.174	1.03	C27 H30 O16	1.69	97.96	Pass	610.153	G7A-neg	Sample	Instrument 1	P1-C1	Metabol1_MS-neg-50mm-poroshel.m	Ginkgo.m	Success	Ginkgo-7	A
Ginkgolide A like	11	Cpd 11: C20 H24 O9	C20 H24 O9	C20 H24 O9	22108	Find By Formula	262539	847.268	1	G7A-neg.d	7.072	C20 H24 O9	76784	FBF	FBF	3	Negative	1	1	408.142	99.63	407.135	7.006	6.981	0.091	-0.04	C20 H24 O9	-0.1	99.63	Pass	408.142	G7A-neg	Sample	Instrument 1	P1-C1	Metabol1_MS-neg-50mm-poroshel.m	Ginkgo.m	Success	Ginkgo-7	A
Ginkgolide A like	13	Cpd 13: C20 H24 O9	C20 H24 O9	C20 H24 O9	22108	Find By Formula	262539	847.268	1	G7A-neg.d	7.072	C20 H24 O9	76784	FBF	FBF	3	Negative	1	1	408.142	99.63	407.135	7.006	6.981	0.091	-0.04	C20 H24 O9	-0.1	99.63	Pass	408.142	G7A-neg	Sample	Instrument 1	P1-C1	Metabol1_MS-neg-50mm-poroshel.m	Ginkgo.m	Success	Ginkgo-7	A
Ginkgolide B like	15	Cpd 15: C20 H24 O10	C20 H24 O10	C20 H24 O10	154243	Find By Formula	3105765	847.268	1	G7A-neg.d	7.08	C20 H24 O10	785666	FBF	FBF	5	Negative	1	1	424.137	98.89	423.13	7.014	6.956	0.124	0.35	C20 H24 O10	0.83	98.89	Pass	424.137	G7A-neg	Sample	Instrument 1	P1-C1	Metabol1_MS-neg-50mm-poroshel.m	Ginkgo.m	Success	Ginkgo-7	A
Ginkgolide C like	16	Cpd 16: C20 H24 O11	C20 H24 O11	C20 H24 O11	205360	Find By Formula	3984252	765.226	1	G7A-neg.d	5.878	C20 H24 O11	1290823	FBF	FBF	4	Negative	1	1	440.132	98.83	439.125	5.803	5.737	0.141	0.6	C20 H24 O11	1.36	98.83	Pass	440.132	G7A-neg	Sample	Instrument 1	P1-C1	Metabol1_MS-neg-50mm-poroshel.m	Ginkgo.m	Success	Ginkgo-7	A
Bilobalide-like	17	Cpd 17: C15 H18 O8	C15 H18 O8	C15 H18 O8	71608	Find By Formula	758344	325.094	1	G7A-neg.d	4.319	C15 H18 O8	301291	FBF	FBF	4	Negative	1	1	326.101	97.19	325.094	4.269	4.236	0.083	0.74	C15 H18 O8	2.27	97.19	Pass	326.1	G7A-neg	Sample	Instrument 1	P1-C1	Metabol1_MS-neg-50mm-poroshel.m	Ginkgo.m	Success	Ginkgo-7	A
Bilobalide-like	18	Cpd 18: C15 H18 O8	C15 H18 O8	C15 H18 O8	534128	Find By Formula	8303903	325.093	1	G7A-neg.d	5.845	C15 H18 O8	2409340	FBF	FBF	4	Negative	1	1	326.101	99.5	325.093	5.762	5.712	0.133	0.32	C15 H18 O8	0.99	99.5	Pass	326.1	G7A-neg	Sample	Instrument 1	P1-C1	Metabol1_MS-neg-50mm-poroshel.m	Ginkgo.m	Success	Ginkgo-7	A
Quercetin-like	1	Cpd 1: C15 H10 O7	C15 H10 O7	C15 H10 O7	567849	Find By Formula	15694597	603.079	1	G7B-neg.d	7.194	C15 H10 O7	2836243	FBF	FBF	4	Negative	1	1	302.043	99.06	301.036	7.103	7.02	0.174	0.41	C15 H10 O7	1.35	99.06	Pass	302.043	G7B-neg	Sample	Instrument 1	P1-C2	Metabol1_MS-neg-50mm-poroshel.m	Ginkgo.m	Success	Ginkgo-7	B
Quercetrin-like	2	Cpd 2: C21 H20 O11	C21 H20 O11	C21 H20 O11	41359	Find By Formula	801753	301.035	1	G7B-neg.d	5.967	C21 H20 O11	244629	FBF	FBF	4	Negative	1	1	448.1	99.73	447.093	5.909	5.801	0.166	-0.17	C21 H20 O11	-0.38	99.73	Pass	448.101	G7B-neg	Sample	Instrument 1	P1-C2	Metabol1_MS-neg-50mm-poroshel.m	Ginkgo.m	Success	Ginkgo-7	B
Quercetrin-like	3	Cpd 3: C21 H20 O11	C21 H20 O11	C21 H20 O11	38631	Find By Formula	572802	593.152	1	G7B-neg.d	6.091	C21 H20 O11	222773	FBF	FBF	4	Negative	1	1	448.101	98.78	447.093	6.017	5.967	0.124	0.01	C21 H20 O11	0.01	98.78	Pass	448.101	G7B-neg	Sample	Instrument 1	P1-C2	Metabol1_MS-neg-50mm-poroshel.m	Ginkgo.m	Success	Ginkgo-7	B
Quercetrin-like	4	Cpd 4: C21 H20 O11	C21 H20 O11	C21 H20 O11	25791	Find By Formula	659202	419.229	1	G7B-neg.d	6.265	C21 H20 O11	192317	FBF	FBF	4	Negative	1	1	448.101	98.54	447.093	6.216	6.091	0.174	0.18	C21 H20 O11	0.39	98.54	Pass	448.101	G7B-neg	Sample	Instrument 1	P1-C2	Metabol1_MS-neg-50mm-poroshel.m	Ginkgo.m	Success	Ginkgo-7	B
Kaempferol-like	5	Cpd 5: C15 H10 O6	C15 H10 O6	C15 H10 O6	1913922	Find By Formula	32847821	285.041	1	G7B-neg.d	7.932	C15 H10 O6	8424647	FBF	FBF	4	Negative	1	1	286.048	98.5	285.041	7.858	7.8	0.133	0.47	C15 H10 O6	1.63	98.5	Pass	286.048	G7B-neg	Sample	Instrument 1	P1-C2	Metabol1_MS-neg-50mm-poroshel.m	Ginkgo.m	Success	Ginkgo-7	B
Isorhamnetin-like	6	Cpd 6: C16 H12 O7	C16 H12 O7	C16 H12 O7	233945	Find By Formula	7364836	315.051	1	G7B-neg.d	8.107	C16 H12 O7	1739126	FBF	FBF	4	Negative	1	1	316.059	99	315.051	7.974	7.866	0.241	0.45	C16 H12 O7	1.42	99	Pass	316.058	G7B-neg	Sample	Instrument 1	P1-C2	Metabol1_MS-neg-50mm-poroshel.m	Ginkgo.m	Success	Ginkgo-7	B
Quercetin-3-beta-glucoside-like	8	Cpd 8: C21 H20 O12	C21 H20 O12	C21 H20 O12	42686	Find By Formula	221263	463.089	1	G7B-neg.d	5.61	C21 H20 O12	117506	FBF	FBF	5	Negative	1	1	464.096	99.3	463.089	5.561	5.544	0.066	0.12	C21 H20 O12	0.25	99.3	Pass	464.096	G7B-neg	Sample	Instrument 1	P1-C2	Metabol1_MS-neg-50mm-poroshel.m	Ginkgo.m	Success	Ginkgo-7	B
Quercetin-3-beta-glucoside-like	9	Cpd 9: C21 H20 O12	C21 H20 O12	C21 H20 O12	21190	Find By Formula	326547	325.093	1	G7B-neg.d	5.809	C21 H20 O12	131026	FBF	FBF	4	Negative	1	1	464.095	99.52	463.088	5.743	5.685	0.124	-0.28	C21 H20 O12	-0.6	99.52	Pass	464.096	G7B-neg	Sample	Instrument 1	P1-C2	Metabol1_MS-neg-50mm-poroshel.m	Ginkgo.m	Success	Ginkgo-7	B
Rutin-like	10	Cpd 10: C27 H30 O16	C27 H30 O16	C27 H30 O16	192265	Find By Formula	8397835	609.147	1	G7B-neg.d	5.469	C27 H30 O16	2372011	FBF	FBF	5	Negative	1	1	610.154	99.51	609.147	5.395	5.212	0.257	0.4	C27 H30 O16	0.65	99.51	Pass	610.153	G7B-neg	Sample	Instrument 1	P1-C2	Metabol1_MS-neg-50mm-poroshel.m	Ginkgo.m	Success	Ginkgo-7	B
Rutin-like	11	Cpd 11: C27 H30 O16	C27 H30 O16	C27 H30 O16	113230	Find By Formula	3294276	325.094	1	G7B-neg.d	5.76	C27 H30 O16	1182585	FBF	FBF	4	Negative	1	1	610.154	99.58	609.147	5.677	5.569	0.191	0.39	C27 H30 O16	0.64	99.58	Pass	610.153	G7B-neg	Sample	Instrument 1	P1-C2	Metabol1_MS-neg-50mm-poroshel.m	Ginkgo.m	Success	Ginkgo-7	B
Ginkgolide A like	12	Cpd 12: C20 H24 O9	C20 H24 O9	C20 H24 O9	3647	Find By Formula	76465	345.061	1	G7B-neg.d	8.231	C20 H24 O9	27156	FBF	FBF	3	Negative	1	1	408.142	93.7	407.135	8.156	8.115	0.116	0.12	C20 H24 O9	0.3	93.7	Pass	408.142	G7B-neg	Sample	Instrument 1	P1-C2	Metabol1_MS-neg-50mm-poroshel.m	Ginkgo.m	Success	Ginkgo-7	B
Ginkgolide A like	13	Cpd 13: C20 H24 O9	C20 H24 O9	C20 H24 O9	3647	Find By Formula	76465	345.061	1	G7B-neg.d	8.231	C20 H24 O9	27156	FBF	FBF	3	Negative	1	1	408.142	93.7	407.135	8.156	8.115	0.116	0.12	C20 H24 O9	0.3	93.7	Pass	408.142	G7B-neg	Sample	Instrument 1	P1-C2	Metabol1_MS-neg-50mm-poroshel.m	Ginkgo.m	Success	Ginkgo-7	B
Ginkgolide B like	14	Cpd 14: C20 H24 O10	C20 H24 O10	C20 H24 O10	147001	Find By Formula	3626225	453.141	1	G7B-neg.d	7.095	C20 H24 O10	829598	FBF	FBF	4	Negative	1	1	424.137	98.91	423.13	7.012	6.929	0.166	0.37	C20 H24 O10	0.88	98.91	Pass	424.137	G7B-neg	Sample	Instrument 1	P1-C2	Metabol1_MS-neg-50mm-poroshel.m	Ginkgo.m	Success	Ginkgo-7	B
Ginkgolide C like	15	Cpd 15: C20 H24 O11	C20 H24 O11	C20 H24 O11	192806	Find By Formula	3603843	765.226	1	G7B-neg.d	5.876	C20 H24 O11	1187993	FBF	FBF	4	Negative	1	1	440.132	99.42	439.125	5.801	5.743	0.133	0.2	C20 H24 O11	0.46	99.42	Pass	440.132	G7B-neg	Sample	Instrument 1	P1-C2	Metabol1_MS-neg-50mm-poroshel.m	Ginkgo.m	Success	Ginkgo-7	B
Bilobalide-like	16	Cpd 16: C15 H18 O8	C15 H18 O8	C15 H18 O8	74802	Find By Formula	521383	325.093	1	G7B-neg.d	4.317	C15 H18 O8	278906	FBF	FBF	4	Negative	1	1	326.1	99.45	325.093	4.275	4.242	0.075	0.19	C15 H18 O8	0.58	99.45	Pass	326.1	G7B-neg	Sample	Instrument 1	P1-C2	Metabol1_MS-neg-50mm-poroshel.m	Ginkgo.m	Success	Ginkgo-7	B
Bilobalide-like	17	Cpd 17: C15 H18 O8	C15 H18 O8	C15 H18 O8	476719	Find By Formula	8723866	325.093	1	G7B-neg.d	5.843	C15 H18 O8	2382350	FBF	FBF	4	Negative	1	1	326.1	99.81	325.093	5.76	5.702	0.141	0.05	C15 H18 O8	0.15	99.81	Pass	326.1	G7B-neg	Sample	Instrument 1	P1-C2	Metabol1_MS-neg-50mm-poroshel.m	Ginkgo.m	Success	Ginkgo-7	B
Quercetin-like	2	Cpd 2: C15 H10 O7	C15 H10 O7	C15 H10 O7	372693	Find By Formula	2142646	603.078	1	G7C-neg.d	7.112	C15 H10 O7	237307	FBF	FBF	4	Negative	1	1	302.043	99.7	301.035	7.104	7.037	0.075	-0.09	C15 H10 O7	-0.28	99.7	Pass	302.043	G7C-neg	Sample	Instrument 1	P1-C3	Metabol1_MS-neg-50mm-poroshel.m	Ginkgo.m	Success	Ginkgo-7	C
Quercetrin-like	3	Cpd 3: C21 H20 O11	C21 H20 O11	C21 H20 O11	38818	Find By Formula	776832	447.093	1	G7C-neg.d	5.959	C21 H20 O11	236919	FBF	FBF	4	Negative	1	1	448.101	99.81	447.093	5.901	5.793	0.166	0.13	C21 H20 O11	0.3	99.81	Pass	448.101	G7C-neg	Sample	Instrument 1	P1-C3	Metabol1_MS-neg-50mm-poroshel.m	Ginkgo.m	Success	Ginkgo-7	C
Quercetrin-like	4	Cpd 4: C21 H20 O11	C21 H20 O11	C21 H20 O11	40439	Find By Formula	511281	593.152	1	G7C-neg.d	6.075	C21 H20 O11	195004	FBF	FBF	4	Negative	1	1	448.101	99.37	447.094	6.017	5.976	0.1	0.24	C21 H20 O11	0.54	99.37	Pass	448.101	G7C-neg	Sample	Instrument 1	P1-C3	Metabol1_MS-neg-50mm-poroshel.m	Ginkgo.m	Success	Ginkgo-7	C
Quercetrin-like	5	Cpd 5: C21 H20 O11	C21 H20 O11	C21 H20 O11	25179	Find By Formula	586351	755.183	1	G7C-neg.d	6.299	C21 H20 O11	199365	FBF	FBF	4	Negative	1	1	448.101	98.76	447.093	6.216	6.117	0.182	-0.11	C21 H20 O11	-0.24	98.76	Pass	448.101	G7C-neg	Sample	Instrument 1	P1-C3	Metabol1_MS-neg-50mm-poroshel.m	Ginkgo.m	Success	Ginkgo-7	C
Kaempferol-like	6	Cpd 6: C15 H10 O6	C15 H10 O6	C15 H10 O6	1804709	Find By Formula	30755929	285.041	1	G7C-neg.d	7.933	C15 H10 O6	8237923	FBF	FBF	4	Negative	1	1	286.048	98.43	285.041	7.858	7.8	0.133	0.44	C15 H10 O6	1.54	98.43	Pass	286.048	G7C-neg	Sample	Instrument 1	P1-C3	Metabol1_MS-neg-50mm-poroshel.m	Ginkgo.m	Success	Ginkgo-7	C
Isorhamnetin-like	7	Cpd 7: C16 H12 O7	C16 H12 O7	C16 H12 O7	233718	Find By Formula	7030018	315.051	1	G7C-neg.d	8.082	C16 H12 O7	1689138	FBF	FBF	4	Negative	1	1	316.059	99.09	315.051	7.966	7.858	0.224	0.37	C16 H12 O7	1.16	99.09	Pass	316.058	G7C-neg	Sample	Instrument 1	P1-C3	Metabol1_MS-neg-50mm-poroshel.m	Ginkgo.m	Success	Ginkgo-7	C
Quercetin-3-beta-glucoside-like	8	Cpd 8: C21 H20 O12	C21 H20 O12	C21 H20 O12	16733	Find By Formula	185653	463.088	1	G7C-neg.d	5.545	C21 H20 O12	70024	FBF	FBF	3	Negative	1	1	464.095	90.18	463.088	5.528	5.495	0.05	-0.42	C21 H20 O12	-0.9	90.18	Pass	464.096	G7C-neg	Sample	Instrument 1	P1-C3	Metabol1_MS-neg-50mm-poroshel.m	Ginkgo.m	Success	Ginkgo-7	C
Quercetin-3-beta-glucoside-like	9	Cpd 9: C21 H20 O12	C21 H20 O12	C21 H20 O12	8352	Find By Formula	317877	325.093	1	G7C-neg.d	5.802	C21 H20 O12	126574	FBF	FBF	4	Negative	1	1	464.095	97.08	463.088	5.744	5.677	0.124	-0.16	C21 H20 O12	-0.35	97.08	Pass	464.096	G7C-neg	Sample	Instrument 1	P1-C3	Metabol1_MS-neg-50mm-poroshel.m	Ginkgo.m	Success	Ginkgo-7	C
Rutin-like	10	Cpd 10: C27 H30 O16	C27 H30 O16	C27 H30 O16	215985	Find By Formula	6927341	609.147	1	G7C-neg.d	5.47	C27 H30 O16	2251961	FBF	FBF	5	Negative	1	1	610.154	98.52	609.147	5.395	5.304	0.166	0.88	C27 H30 O16	1.43	98.52	Pass	610.153	G7C-neg	Sample	Instrument 1	P1-C3	Metabol1_MS-neg-50mm-poroshel.m	Ginkgo.m	Success	Ginkgo-7	C
Rutin-like	11	Cpd 11: C27 H30 O16	C27 H30 O16	C27 H30 O16	112687	Find By Formula	3299550	325.093	1	G7C-neg.d	5.768	C27 H30 O16	1195046	FBF	FBF	4	Negative	1	1	610.153	99.82	609.146	5.677	5.561	0.207	-0.02	C27 H30 O16	-0.03	99.82	Pass	610.153	G7C-neg	Sample	Instrument 1	P1-C3	Metabol1_MS-neg-50mm-poroshel.m	Ginkgo.m	Success	Ginkgo-7	C
Ginkgolide A like	13	Cpd 13: C20 H24 O9	C20 H24 O9	C20 H24 O9	3369	Find By Formula	57428	345.062	1	G7C-neg.d	8.198	C20 H24 O9	18449	FBF	FBF	3	Negative	1	1	408.142	95.5	407.135	8.157	8.099	0.1	-0.24	C20 H24 O9	-0.58	95.5	Pass	408.142	G7C-neg	Sample	Instrument 1	P1-C3	Metabol1_MS-neg-50mm-poroshel.m	Ginkgo.m	Success	Ginkgo-7	C
Ginkgolide A like	15	Cpd 15: C20 H24 O9	C20 H24 O9	C20 H24 O9	3369	Find By Formula	57428	345.062	1	G7C-neg.d	8.198	C20 H24 O9	18449	FBF	FBF	3	Negative	1	1	408.142	95.5	407.135	8.157	8.099	0.1	-0.24	C20 H24 O9	-0.58	95.5	Pass	408.142	G7C-neg	Sample	Instrument 1	P1-C3	Metabol1_MS-neg-50mm-poroshel.m	Ginkgo.m	Success	Ginkgo-7	C
Ginkgolide B like	16	Cpd 16: C20 H24 O10	C20 H24 O10	C20 H24 O10	145137	Find By Formula	2613022	847.267	1	G7C-neg.d	7.079	C20 H24 O10	743567	FBF	FBF	4	Negative	1	1	424.137	99.42	423.13	7.021	6.963	0.116	0.06	C20 H24 O10	0.15	99.42	Pass	424.137	G7C-neg	Sample	Instrument 1	P1-C3	Metabol1_MS-neg-50mm-poroshel.m	Ginkgo.m	Success	Ginkgo-7	C
Ginkgolide C like	17	Cpd 17: C20 H24 O11	C20 H24 O11	C20 H24 O11	186100	Find By Formula	3581120	765.225	1	G7C-neg.d	5.868	C20 H24 O11	1196912	FBF	FBF	4	Negative	1	1	440.132	99.27	439.125	5.81	5.744	0.124	0.25	C20 H24 O11	0.57	99.27	Pass	440.132	G7C-neg	Sample	Instrument 1	P1-C3	Metabol1_MS-neg-50mm-poroshel.m	Ginkgo.m	Success	Ginkgo-7	C
Bilobalide-like	18	Cpd 18: C15 H18 O8	C15 H18 O8	C15 H18 O8	482993	Find By Formula	7937137	325.093	1	G7C-neg.d	5.851	C15 H18 O8	2177087	FBF	FBF	4	Negative	1	1	326.1	99.85	325.093	5.76	5.71	0.141	0.07	C15 H18 O8	0.22	99.85	Pass	326.1	G7C-neg	Sample	Instrument 1	P1-C3	Metabol1_MS-neg-50mm-poroshel.m	Ginkgo.m	Success	Ginkgo-7	C
Quercetin-like	1	Cpd 1: C15 H10 O7	C15 H10 O7	C15 H10 O7	486919	Find By Formula	14308550	603.078	1	G8A-neg.d	7.226	C15 H10 O7	2849085	FBF	FBF	4	Negative	1	1	302.043	99.64	301.036	7.11	7.019	0.207	0.1	C15 H10 O7	0.33	99.64	Pass	302.043	G8A-neg	Sample	Instrument 1	P1-C4	Metabol1_MS-neg-50mm-poroshel.m	Ginkgo.m	Success	Ginkgo-8	A
Quercetrin-like	2	Cpd 2: C21 H20 O11	C21 H20 O11	C21 H20 O11	45156	Find By Formula	1727018	577.157	1	G8A-neg.d	5.982	C21 H20 O11	333230	FBF	FBF	4	Negative	1	1	448.1	99.66	447.093	5.916	5.775	0.207	-0.2	C21 H20 O11	-0.45	99.66	Pass	448.101	G8A-neg	Sample	Instrument 1	P1-C4	Metabol1_MS-neg-50mm-poroshel.m	Ginkgo.m	Success	Ginkgo-8	A
Quercetrin-like	3	Cpd 3: C21 H20 O11	C21 H20 O11	C21 H20 O11	16367	Find By Formula	508252	755.183	1	G8A-neg.d	6.297	C21 H20 O11	143509	FBF	FBF	4	Negative	1	1	448.1	95.09	447.093	6.214	6.098	0.199	-0.11	C21 H20 O11	-0.26	95.09	Pass	448.101	G8A-neg	Sample	Instrument 1	P1-C4	Metabol1_MS-neg-50mm-poroshel.m	Ginkgo.m	Success	Ginkgo-8	A
Kaempferol-like	4	Cpd 4: C15 H10 O6	C15 H10 O6	C15 H10 O6	1013186	Find By Formula	18003789	285.041	1	G8A-neg.d	7.931	C15 H10 O6	5357558	FBF	FBF	4	Negative	1	1	286.048	98.83	285.041	7.856	7.798	0.133	0.2	C15 H10 O6	0.69	98.83	Pass	286.048	G8A-neg	Sample	Instrument 1	P1-C4	Metabol1_MS-neg-50mm-poroshel.m	Ginkgo.m	Success	Ginkgo-8	A
Isorhamnetin-like	5	Cpd 5: C16 H12 O7	C16 H12 O7	C16 H12 O7	200120	Find By Formula	5667319	315.051	1	G8A-neg.d	8.08	C16 H12 O7	1432196	FBF	FBF	4	Negative	1	1	316.058	99.75	315.051	7.973	7.865	0.216	0.14	C16 H12 O7	0.46	99.75	Pass	316.058	G8A-neg	Sample	Instrument 1	P1-C4	Metabol1_MS-neg-50mm-poroshel.m	Ginkgo.m	Success	Ginkgo-8	A
Quercetin-3-beta-glucoside-like	6	Cpd 6: C21 H20 O12	C21 H20 O12	C21 H20 O12	49737	Find By Formula	1036045	463.088	1	G8A-neg.d	5.626	C21 H20 O12	347810	FBF	FBF	4	Negative	1	1	464.096	99.76	463.088	5.568	5.485	0.141	0.08	C21 H20 O12	0.18	99.76	Pass	464.096	G8A-neg	Sample	Instrument 1	P1-C4	Metabol1_MS-neg-50mm-poroshel.m	Ginkgo.m	Success	Ginkgo-8	A
Quercetin-3-beta-glucoside-like	7	Cpd 7: C21 H20 O12	C21 H20 O12	C21 H20 O12	13312	Find By Formula	203462	325.093	1	G8A-neg.d	5.792	C21 H20 O12	86160	FBF	FBF	4	Negative	1	1	464.095	97.7	463.088	5.742	5.692	0.1	-0.4	C21 H20 O12	-0.85	97.7	Pass	464.096	G8A-neg	Sample	Instrument 1	P1-C4	Metabol1_MS-neg-50mm-poroshel.m	Ginkgo.m	Success	Ginkgo-8	A
Rutin-like	8	Cpd 8: C27 H30 O16	C27 H30 O16	C27 H30 O16	308088	Find By Formula	8053738	609.146	1	G8A-neg.d	5.319	C27 H30 O16	2863098	FBF	FBF	5	Negative	1	1	610.154	99.66	609.146	5.269	5.211	0.108	0.25	C27 H30 O16	0.41	99.66	Pass	610.153	G8A-neg	Sample	Instrument 1	P1-C4	Metabol1_MS-neg-50mm-poroshel.m	Ginkgo.m	Success	Ginkgo-8	A
Rutin-like	9	Cpd 9: C27 H30 O16	C27 H30 O16	C27 H30 O16	400567	Find By Formula	9007673	609.147	1	G8A-neg.d	5.46	C27 H30 O16	3144826	FBF	FBF	5	Negative	1	1	610.154	99.34	609.147	5.393	5.344	0.116	0.61	C27 H30 O16	0.99	99.34	Pass	610.153	G8A-neg	Sample	Instrument 1	P1-C4	Metabol1_MS-neg-50mm-poroshel.m	Ginkgo.m	Success	Ginkgo-8	A
Rutin-like	10	Cpd 10: C27 H30 O16	C27 H30 O16	C27 H30 O16	103162	Find By Formula	3142984	593.152	1	G8A-neg.d	5.758	C27 H30 O16	1134716	FBF	FBF	4	Negative	1	1	610.154	99.63	609.146	5.675	5.559	0.199	0.25	C27 H30 O16	0.42	99.63	Pass	610.153	G8A-neg	Sample	Instrument 1	P1-C4	Metabol1_MS-neg-50mm-poroshel.m	Ginkgo.m	Success	Ginkgo-8	A
Ginkgolide A like	11	Cpd 11: C20 H24 O9	C20 H24 O9	C20 H24 O9	23839	Find By Formula	536707	847.267	1	G8A-neg.d	7.077	C20 H24 O9	112527	FBF	FBF	3	Negative	1	1	408.142	98.85	407.135	7.011	6.928	0.149	-0.2	C20 H24 O9	-0.49	98.85	Pass	408.142	G8A-neg	Sample	Instrument 1	P1-C4	Metabol1_MS-neg-50mm-poroshel.m	Ginkgo.m	Success	Ginkgo-8	A
Ginkgolide A like	12	Cpd 12: C20 H24 O9	C20 H24 O9	C20 H24 O9	10219	Find By Formula	219269	345.061	1	G8A-neg.d	8.213	C20 H24 O9	69683	FBF	FBF	4	Negative	1	1	408.141	96.43	407.134	8.163	8.089	0.124	-0.66	C20 H24 O9	-1.62	96.43	Pass	408.142	G8A-neg	Sample	Instrument 1	P1-C4	Metabol1_MS-neg-50mm-poroshel.m	Ginkgo.m	Success	Ginkgo-8	A
Ginkgolide A like	13	Cpd 13: C20 H24 O9	C20 H24 O9	C20 H24 O9	23839	Find By Formula	536707	847.267	1	G8A-neg.d	7.077	C20 H24 O9	112527	FBF	FBF	3	Negative	1	1	408.142	98.85	407.135	7.011	6.928	0.149	-0.2	C20 H24 O9	-0.49	98.85	Pass	408.142	G8A-neg	Sample	Instrument 1	P1-C4	Metabol1_MS-neg-50mm-poroshel.m	Ginkgo.m	Success	Ginkgo-8	A
Ginkgolide A like	14	Cpd 14: C20 H24 O9	C20 H24 O9	C20 H24 O9	10219	Find By Formula	219269	345.061	1	G8A-neg.d	8.213	C20 H24 O9	69683	FBF	FBF	4	Negative	1	1	408.141	96.43	407.134	8.163	8.089	0.124	-0.66	C20 H24 O9	-1.62	96.43	Pass	408.142	G8A-neg	Sample	Instrument 1	P1-C4	Metabol1_MS-neg-50mm-poroshel.m	Ginkgo.m	Success	Ginkgo-8	A
Ginkgolide B like	15	Cpd 15: C20 H24 O10	C20 H24 O10	C20 H24 O10	187490	Find By Formula	4181072	847.267	1	G8A-neg.d	7.085	C20 H24 O10	1037761	FBF	FBF	5	Negative	1	1	424.137	99.23	423.13	7.019	6.944	0.141	0.34	C20 H24 O10	0.8	99.23	Pass	424.137	G8A-neg	Sample	Instrument 1	P1-C4	Metabol1_MS-neg-50mm-poroshel.m	Ginkgo.m	Success	Ginkgo-8	A
Ginkgolide C like	16	Cpd 16: C20 H24 O11	C20 H24 O11	C20 H24 O11	34742	Find By Formula	690421	325.092	1	G8A-neg.d	0.799	C20 H24 O11	162697	FBF	FBF	4	Negative	1	1	440.131	97.09	439.124	0.691	0.633	0.166	-0.67	C20 H24 O11	-1.53	97.09	Pass	440.132	G8A-neg	Sample	Instrument 1	P1-C4	Metabol1_MS-neg-50mm-poroshel.m	Ginkgo.m	Success	Ginkgo-8	A
Ginkgolide C like	17	Cpd 17: C20 H24 O11	C20 H24 O11	C20 H24 O11	209748	Find By Formula	5211575	879.256	1	G8A-neg.d	5.874	C20 H24 O11	1554811	FBF	FBF	4	Negative	1	1	440.132	99.8	439.125	5.8	5.709	0.166	0.06	C20 H24 O11	0.15	99.8	Pass	440.132	G8A-neg	Sample	Instrument 1	P1-C4	Metabol1_MS-neg-50mm-poroshel.m	Ginkgo.m	Success	Ginkgo-8	A
Bilobalide-like	18	Cpd 18: C15 H18 O8	C15 H18 O8	C15 H18 O8	48752	Find By Formula	546054	325.093	1	G8A-neg.d	4.324	C15 H18 O8	216354	FBF	FBF	3	Negative	1	1	326.1	99.14	325.093	4.266	4.232	0.091	0.07	C15 H18 O8	0.22	99.14	Pass	326.1	G8A-neg	Sample	Instrument 1	P1-C4	Metabol1_MS-neg-50mm-poroshel.m	Ginkgo.m	Success	Ginkgo-8	A
Bilobalide-like	19	Cpd 19: C15 H18 O8	C15 H18 O8	C15 H18 O8	250728	Find By Formula	4673818	879.256	1	G8A-neg.d	5.841	C15 H18 O8	1389956	FBF	FBF	5	Negative	1	1	326.1	99.83	325.093	5.758	5.709	0.133	0	C15 H18 O8	0.01	99.83	Pass	326.1	G8A-neg	Sample	Instrument 1	P1-C4	Metabol1_MS-neg-50mm-poroshel.m	Ginkgo.m	Success	Ginkgo-8	A
Bilobalide-like	20	Cpd 20: C15 H18 O8	C15 H18 O8	C15 H18 O8	26967	Find By Formula	571029	603.078	1	G8A-neg.d	7.193	C15 H18 O8	177404	FBF	FBF	4	Negative	1	1	326.1	98.98	325.092	7.094	7.011	0.182	-0.37	C15 H18 O8	-1.15	98.98	Pass	326.1	G8A-neg	Sample	Instrument 1	P1-C4	Metabol1_MS-neg-50mm-poroshel.m	Ginkgo.m	Success	Ginkgo-8	A
Quercetin-like	1	Cpd 1: C15 H10 O7	C15 H10 O7	C15 H10 O7	483520	Find By Formula	14110713	301.036	1	G8B-neg.d	7.205	C15 H10 O7	2870229	FBF	FBF	4	Negative	1	1	302.043	98.48	301.036	7.114	7.023	0.182	0.61	C15 H10 O7	2.03	98.48	Pass	302.043	G8B-neg	Sample	Instrument 1	P1-C5	Metabol1_MS-neg-50mm-poroshel.m	Ginkgo.m	Success	Ginkgo-8	B
Quercetrin-like	2	Cpd 2: C21 H20 O11	C21 H20 O11	C21 H20 O11	42199	Find By Formula	1677193	577.157	1	G8B-neg.d	5.986	C21 H20 O11	355587	FBF	FBF	4	Negative	1	1	448.101	99.78	447.093	5.911	5.787	0.199	0.11	C21 H20 O11	0.25	99.78	Pass	448.101	G8B-neg	Sample	Instrument 1	P1-C5	Metabol1_MS-neg-50mm-poroshel.m	Ginkgo.m	Success	Ginkgo-8	B
Quercetrin-like	3	Cpd 3: C21 H20 O11	C21 H20 O11	C21 H20 O11	18953	Find By Formula	401547	755.183	1	G8B-neg.d	6.293	C21 H20 O11	129440	FBF	FBF	4	Negative	1	1	448.101	90.82	447.093	6.218	6.135	0.158	0.31	C21 H20 O11	0.69	90.82	Pass	448.101	G8B-neg	Sample	Instrument 1	P1-C5	Metabol1_MS-neg-50mm-poroshel.m	Ginkgo.m	Success	Ginkgo-8	B
Kaempferol-like	4	Cpd 4: C15 H10 O6	C15 H10 O6	C15 H10 O6	947349	Find By Formula	16718729	285.041	1	G8B-neg.d	7.935	C15 H10 O6	5090522	FBF	FBF	4	Negative	1	1	286.048	98.12	285.041	7.86	7.802	0.133	0.39	C15 H10 O6	1.38	98.12	Pass	286.048	G8B-neg	Sample	Instrument 1	P1-C5	Metabol1_MS-neg-50mm-poroshel.m	Ginkgo.m	Success	Ginkgo-8	B
Isorhamnetin-like	5	Cpd 5: C16 H12 O7	C16 H12 O7	C16 H12 O7	185310	Find By Formula	5387132	315.051	1	G8B-neg.d	8.101	C16 H12 O7	1313542	FBF	FBF	4	Negative	1	1	316.059	99.11	315.051	7.976	7.86	0.241	0.46	C16 H12 O7	1.44	99.11	Pass	316.058	G8B-neg	Sample	Instrument 1	P1-C5	Metabol1_MS-neg-50mm-poroshel.m	Ginkgo.m	Success	Ginkgo-8	B
Quercetin-3-beta-glucoside-like	6	Cpd 6: C21 H20 O12	C21 H20 O12	C21 H20 O12	47993	Find By Formula	978986	463.089	1	G8B-neg.d	5.646	C21 H20 O12	341047	FBF	FBF	4	Negative	1	1	464.096	99.7	463.089	5.571	5.497	0.149	0.31	C21 H20 O12	0.68	99.7	Pass	464.096	G8B-neg	Sample	Instrument 1	P1-C5	Metabol1_MS-neg-50mm-poroshel.m	Ginkgo.m	Success	Ginkgo-8	B
Quercetin-3-beta-glucoside-like	7	Cpd 7: C21 H20 O12	C21 H20 O12	C21 H20 O12	15854	Find By Formula	192408	325.093	1	G8B-neg.d	5.804	C21 H20 O12	88343	FBF	FBF	4	Negative	1	1	464.096	99.39	463.089	5.745	5.704	0.1	0.27	C21 H20 O12	0.57	99.39	Pass	464.096	G8B-neg	Sample	Instrument 1	P1-C5	Metabol1_MS-neg-50mm-poroshel.m	Ginkgo.m	Success	Ginkgo-8	B
Rutin-like	8	Cpd 8: C27 H30 O16	C27 H30 O16	C27 H30 O16	327275	Find By Formula	7783812	609.147	1	G8B-neg.d	5.323	C27 H30 O16	2831261	FBF	FBF	5	Negative	1	1	610.154	98.9	609.147	5.273	5.215	0.108	0.8	C27 H30 O16	1.31	98.9	Pass	610.153	G8B-neg	Sample	Instrument 1	P1-C5	Metabol1_MS-neg-50mm-poroshel.m	Ginkgo.m	Success	Ginkgo-8	B
Rutin-like	9	Cpd 9: C27 H30 O16	C27 H30 O16	C27 H30 O16	376604	Find By Formula	9405336	609.147	1	G8B-neg.d	5.464	C27 H30 O16	3160816	FBF	FBF	5	Negative	1	1	610.154	98.93	609.147	5.397	5.339	0.124	0.77	C27 H30 O16	1.26	98.93	Pass	610.153	G8B-neg	Sample	Instrument 1	P1-C5	Metabol1_MS-neg-50mm-poroshel.m	Ginkgo.m	Success	Ginkgo-8	B
Rutin-like	10	Cpd 10: C27 H30 O16	C27 H30 O16	C27 H30 O16	110877	Find By Formula	3017609	593.152	1	G8B-neg.d	5.762	C27 H30 O16	1150725	FBF	FBF	4	Negative	1	1	610.154	99.57	609.146	5.679	5.58	0.182	0.3	C27 H30 O16	0.5	99.57	Pass	610.153	G8B-neg	Sample	Instrument 1	P1-C5	Metabol1_MS-neg-50mm-poroshel.m	Ginkgo.m	Success	Ginkgo-8	B
Ginkgolide A like	11	Cpd 11: C20 H24 O9	C20 H24 O9	C20 H24 O9	21420	Find By Formula	681166	847.268	1	G8B-neg.d	7.097	C20 H24 O9	125903	FBF	FBF	3	Negative	1	1	408.142	98.69	407.135	7.006	6.89	0.207	0.29	C20 H24 O9	0.7	98.69	Pass	408.142	G8B-neg	Sample	Instrument 1	P1-C5	Metabol1_MS-neg-50mm-poroshel.m	Ginkgo.m	Success	Ginkgo-8	B
Ginkgolide A like	12	Cpd 12: C20 H24 O9	C20 H24 O9	C20 H24 O9	10076	Find By Formula	188012	407.135	1	G8B-neg.d	8.217	C20 H24 O9	66703	FBF	FBF	4	Negative	1	1	408.142	97.3	407.135	8.159	8.101	0.116	-0.14	C20 H24 O9	-0.34	97.3	Pass	408.142	G8B-neg	Sample	Instrument 1	P1-C5	Metabol1_MS-neg-50mm-poroshel.m	Ginkgo.m	Success	Ginkgo-8	B
Ginkgolide A like	13	Cpd 13: C20 H24 O9	C20 H24 O9	C20 H24 O9	21420	Find By Formula	681166	847.268	1	G8B-neg.d	7.097	C20 H24 O9	125903	FBF	FBF	3	Negative	1	1	408.142	98.69	407.135	7.006	6.89	0.207	0.29	C20 H24 O9	0.7	98.69	Pass	408.142	G8B-neg	Sample	Instrument 1	P1-C5	Metabol1_MS-neg-50mm-poroshel.m	Ginkgo.m	Success	Ginkgo-8	B
Ginkgolide A like	14	Cpd 14: C20 H24 O9	C20 H24 O9	C20 H24 O9	10076	Find By Formula	188012	407.135	1	G8B-neg.d	8.217	C20 H24 O9	66703	FBF	FBF	4	Negative	1	1	408.142	97.3	407.135	8.159	8.101	0.116	-0.14	C20 H24 O9	-0.34	97.3	Pass	408.142	G8B-neg	Sample	Instrument 1	P1-C5	Metabol1_MS-neg-50mm-poroshel.m	Ginkgo.m	Success	Ginkgo-8	B
Ginkgolide B like	15	Cpd 15: C20 H24 O10	C20 H24 O10	C20 H24 O10	133593	Find By Formula	6703683	453.141	1	G8B-neg.d	7.097	C20 H24 O10	1185067	FBF	FBF	4	Negative	1	1	424.138	97.36	423.131	7.014	6.824	0.274	0.81	C20 H24 O10	1.9	97.36	Pass	424.137	G8B-neg	Sample	Instrument 1	P1-C5	Metabol1_MS-neg-50mm-poroshel.m	Ginkgo.m	Success	Ginkgo-8	B
Ginkgolide C like	16	Cpd 16: C20 H24 O11	C20 H24 O11	C20 H24 O11	30714	Find By Formula	293323	439.124	1	G8B-neg.d	0.62	C20 H24 O11	177655	FBF	FBF	4	Negative	1	1	440.131	98.86	439.124	0.587	0.571	0.05	-0.62	C20 H24 O11	-1.4	98.86	Pass	440.132	G8B-neg	Sample	Instrument 1	P1-C5	Metabol1_MS-neg-50mm-poroshel.m	Ginkgo.m	Success	Ginkgo-8	B
Ginkgolide C like	17	Cpd 17: C20 H24 O11	C20 H24 O11	C20 H24 O11	31750	Find By Formula	539217	325.093	1	G8B-neg.d	0.803	C20 H24 O11	132663	FBF	FBF	4	Negative	1	1	440.132	99.17	439.124	0.678	0.637	0.166	-0.34	C20 H24 O11	-0.77	99.17	Pass	440.132	G8B-neg	Sample	Instrument 1	P1-C5	Metabol1_MS-neg-50mm-poroshel.m	Ginkgo.m	Success	Ginkgo-8	B
Ginkgolide C like	18	Cpd 18: C20 H24 O11	C20 H24 O11	C20 H24 O11	205611	Find By Formula	4984188	879.257	1	G8B-neg.d	5.878	C20 H24 O11	1472640	FBF	FBF	4	Negative	1	1	440.132	99.14	439.125	5.804	5.721	0.158	0.45	C20 H24 O11	1.02	99.14	Pass	440.132	G8B-neg	Sample	Instrument 1	P1-C5	Metabol1_MS-neg-50mm-poroshel.m	Ginkgo.m	Success	Ginkgo-8	B
Bilobalide-like	19	Cpd 19: C15 H18 O8	C15 H18 O8	C15 H18 O8	46094	Find By Formula	492932	325.093	1	G8B-neg.d	4.319	C15 H18 O8	204639	FBF	FBF	4	Negative	1	1	326.101	99.41	325.093	4.278	4.236	0.083	0.37	C15 H18 O8	1.13	99.41	Pass	326.1	G8B-neg	Sample	Instrument 1	P1-C5	Metabol1_MS-neg-50mm-poroshel.m	Ginkgo.m	Success	Ginkgo-8	B
Bilobalide-like	20	Cpd 20: C15 H18 O8	C15 H18 O8	C15 H18 O8	296797	Find By Formula	4569743	325.093	1	G8B-neg.d	5.845	C15 H18 O8	1389852	FBF	FBF	4	Negative	1	1	326.101	99.34	325.093	5.762	5.712	0.133	0.36	C15 H18 O8	1.11	99.34	Pass	326.1	G8B-neg	Sample	Instrument 1	P1-C5	Metabol1_MS-neg-50mm-poroshel.m	Ginkgo.m	Success	Ginkgo-8	B
Bilobalide-like	21	Cpd 21: C15 H18 O8	C15 H18 O8	C15 H18 O8	21790	Find By Formula	493307	603.079	1	G8B-neg.d	7.172	C15 H18 O8	148725	FBF	FBF	4	Negative	1	1	326.1	99.8	325.093	7.089	7.006	0.166	0.12	C15 H18 O8	0.37	99.8	Pass	326.1	G8B-neg	Sample	Instrument 1	P1-C5	Metabol1_MS-neg-50mm-poroshel.m	Ginkgo.m	Success	Ginkgo-8	B
Quercetin-like	1	Cpd 1: C15 H10 O7	C15 H10 O7	C15 H10 O7	478691	Find By Formula	14702749	603.078	1	G8C-neg.d	7.221	C15 H10 O7	2900006	FBF	FBF	4	Negative	1	1	302.043	99.77	301.035	7.105	7.013	0.207	0.04	C15 H10 O7	0.13	99.77	Pass	302.043	G8C-neg	Sample	Instrument 1	P1-C6	Metabol1_MS-neg-50mm-poroshel.m	Ginkgo.m	Success	Ginkgo-8	C
Quercetrin-like	2	Cpd 2: C21 H20 O11	C21 H20 O11	C21 H20 O11	45188	Find By Formula	1731094	577.157	1	G8C-neg.d	5.993	C21 H20 O11	329434	FBF	FBF	4	Negative	1	1	448.101	99.66	447.093	5.91	5.778	0.216	-0.11	C21 H20 O11	-0.24	99.66	Pass	448.101	G8C-neg	Sample	Instrument 1	P1-C6	Metabol1_MS-neg-50mm-poroshel.m	Ginkgo.m	Success	Ginkgo-8	C
Quercetrin-like	3	Cpd 3: C21 H20 O11	C21 H20 O11	C21 H20 O11	24298	Find By Formula	306569	755.183	1	G8C-neg.d	6.275	C21 H20 O11	131270	FBF	FBF	4	Negative	1	1	448.101	97.44	447.093	6.217	6.176	0.1	0.16	C21 H20 O11	0.35	97.44	Pass	448.101	G8C-neg	Sample	Instrument 1	P1-C6	Metabol1_MS-neg-50mm-poroshel.m	Ginkgo.m	Success	Ginkgo-8	C
Kaempferol-like	4	Cpd 4: C15 H10 O6	C15 H10 O6	C15 H10 O6	1051848	Find By Formula	17138722	285.041	1	G8C-neg.d	7.934	C15 H10 O6	5108646	FBF	FBF	4	Negative	1	1	286.048	98.8	285.041	7.859	7.801	0.133	0.16	C15 H10 O6	0.55	98.8	Pass	286.048	G8C-neg	Sample	Instrument 1	P1-C6	Metabol1_MS-neg-50mm-poroshel.m	Ginkgo.m	Success	Ginkgo-8	C
Isorhamnetin-like	5	Cpd 5: C16 H12 O7	C16 H12 O7	C16 H12 O7	190578	Find By Formula	5406177	315.051	1	G8C-neg.d	8.083	C16 H12 O7	1369310	FBF	FBF	5	Negative	1	1	316.059	99.55	315.051	7.976	7.868	0.216	0.28	C16 H12 O7	0.88	99.55	Pass	316.058	G8C-neg	Sample	Instrument 1	P1-C6	Metabol1_MS-neg-50mm-poroshel.m	Ginkgo.m	Success	Ginkgo-8	C
Quercetin-3-beta-glucoside-like	6	Cpd 6: C21 H20 O12	C21 H20 O12	C21 H20 O12	43293	Find By Formula	1139396	463.088	1	G8C-neg.d	5.637	C21 H20 O12	347476	FBF	FBF	4	Negative	1	1	464.095	99.87	463.088	5.57	5.463	0.174	-0.08	C21 H20 O12	-0.17	99.87	Pass	464.096	G8C-neg	Sample	Instrument 1	P1-C6	Metabol1_MS-neg-50mm-poroshel.m	Ginkgo.m	Success	Ginkgo-8	C
Quercetin-3-beta-glucoside-like	7	Cpd 7: C21 H20 O12	C21 H20 O12	C21 H20 O12	14408	Find By Formula	199088	325.093	1	G8C-neg.d	5.819	C21 H20 O12	89304	FBF	FBF	3	Negative	1	1	464.095	99.21	463.088	5.745	5.687	0.133	-0.36	C21 H20 O12	-0.78	99.21	Pass	464.096	G8C-neg	Sample	Instrument 1	P1-C6	Metabol1_MS-neg-50mm-poroshel.m	Ginkgo.m	Success	Ginkgo-8	C
Rutin-like	8	Cpd 8: C27 H30 O16	C27 H30 O16	C27 H30 O16	309327	Find By Formula	7987539	609.147	1	G8C-neg.d	5.322	C27 H30 O16	2825416	FBF	FBF	5	Negative	1	1	610.154	99.48	609.147	5.272	5.214	0.108	0.49	C27 H30 O16	0.81	99.48	Pass	610.153	G8C-neg	Sample	Instrument 1	P1-C6	Metabol1_MS-neg-50mm-poroshel.m	Ginkgo.m	Success	Ginkgo-8	C
Rutin-like	9	Cpd 9: C27 H30 O16	C27 H30 O16	C27 H30 O16	405893	Find By Formula	9452753	609.146	1	G8C-neg.d	5.463	C27 H30 O16	3142383	FBF	FBF	5	Negative	1	1	610.154	99.77	609.146	5.396	5.338	0.124	0.31	C27 H30 O16	0.51	99.77	Pass	610.153	G8C-neg	Sample	Instrument 1	P1-C6	Metabol1_MS-neg-50mm-poroshel.m	Ginkgo.m	Success	Ginkgo-8	C
Rutin-like	10	Cpd 10: C27 H30 O16	C27 H30 O16	C27 H30 O16	108945	Find By Formula	2995254	593.151	1	G8C-neg.d	5.761	C27 H30 O16	1161943	FBF	FBF	4	Negative	1	1	610.153	99.76	609.146	5.678	5.579	0.182	-0.16	C27 H30 O16	-0.26	99.76	Pass	610.153	G8C-neg	Sample	Instrument 1	P1-C6	Metabol1_MS-neg-50mm-poroshel.m	Ginkgo.m	Success	Ginkgo-8	C
Ginkgolide A like	11	Cpd 11: C20 H24 O9	C20 H24 O9	C20 H24 O9	9100	Find By Formula	201939	939.496	1	G8C-neg.d	8.233	C20 H24 O9	57670	FBF	FBF	4	Negative	1	1	408.142	99.56	407.134	8.158	8.092	0.141	-0.37	C20 H24 O9	-0.9	99.56	Pass	408.142	G8C-neg	Sample	Instrument 1	P1-C6	Metabol1_MS-neg-50mm-poroshel.m	Ginkgo.m	Success	Ginkgo-8	C
Ginkgolide A like	12	Cpd 12: C20 H24 O9	C20 H24 O9	C20 H24 O9	9100	Find By Formula	201939	939.496	1	G8C-neg.d	8.233	C20 H24 O9	57670	FBF	FBF	4	Negative	1	1	408.142	99.56	407.134	8.158	8.092	0.141	-0.37	C20 H24 O9	-0.9	99.56	Pass	408.142	G8C-neg	Sample	Instrument 1	P1-C6	Metabol1_MS-neg-50mm-poroshel.m	Ginkgo.m	Success	Ginkgo-8	C
Ginkgolide B like	13	Cpd 13: C20 H24 O10	C20 H24 O10	C20 H24 O10	185453	Find By Formula	4637958	847.267	1	G8C-neg.d	7.088	C20 H24 O10	1062803	FBF	FBF	5	Negative	1	1	424.137	99.27	423.13	7.013	6.931	0.158	0.01	C20 H24 O10	0.02	99.27	Pass	424.137	G8C-neg	Sample	Instrument 1	P1-C6	Metabol1_MS-neg-50mm-poroshel.m	Ginkgo.m	Success	Ginkgo-8	C
Ginkgolide C like	14	Cpd 14: C20 H24 O11	C20 H24 O11	C20 H24 O11	37361	Find By Formula	676803	325.093	1	G8C-neg.d	0.802	C20 H24 O11	148481	FBF	FBF	3	Negative	1	1	440.132	99.28	439.125	0.686	0.636	0.166	-0.16	C20 H24 O11	-0.35	99.28	Pass	440.132	G8C-neg	Sample	Instrument 1	P1-C6	Metabol1_MS-neg-50mm-poroshel.m	Ginkgo.m	Success	Ginkgo-8	C
Ginkgolide C like	15	Cpd 15: C20 H24 O11	C20 H24 O11	C20 H24 O11	211160	Find By Formula	5175674	879.257	1	G8C-neg.d	5.894	C20 H24 O11	1491354	FBF	FBF	4	Negative	1	1	440.132	99.8	439.125	5.803	5.711	0.182	0.06	C20 H24 O11	0.15	99.8	Pass	440.132	G8C-neg	Sample	Instrument 1	P1-C6	Metabol1_MS-neg-50mm-poroshel.m	Ginkgo.m	Success	Ginkgo-8	C
Bilobalide-like	16	Cpd 16: C15 H18 O8	C15 H18 O8	C15 H18 O8	37780	Find By Formula	466666	325.093	1	G8C-neg.d	4.318	C15 H18 O8	202428	FBF	FBF	4	Negative	1	1	326.1	99.2	325.093	4.268	4.235	0.083	0.19	C15 H18 O8	0.59	99.2	Pass	326.1	G8C-neg	Sample	Instrument 1	P1-C6	Metabol1_MS-neg-50mm-poroshel.m	Ginkgo.m	Success	Ginkgo-8	C
Bilobalide-like	17	Cpd 17: C15 H18 O8	C15 H18 O8	C15 H18 O8	304444	Find By Formula	4599624	325.093	1	G8C-neg.d	5.844	C15 H18 O8	1429688	FBF	FBF	5	Negative	1	1	326.1	99.77	325.093	5.761	5.711	0.133	-0.02	C15 H18 O8	-0.07	99.77	Pass	326.1	G8C-neg	Sample	Instrument 1	P1-C6	Metabol1_MS-neg-50mm-poroshel.m	Ginkgo.m	Success	Ginkgo-8	C
Bilobalide-like	18	Cpd 18: C15 H18 O8	C15 H18 O8	C15 H18 O8	25428	Find By Formula	539048	603.078	1	G8C-neg.d	7.171	C15 H18 O8	160072	FBF	FBF	3	Negative	1	1	326.1	99.41	325.093	7.088	7.013	0.158	-0.25	C15 H18 O8	-0.78	99.41	Pass	326.1	G8C-neg	Sample	Instrument 1	P1-C6	Metabol1_MS-neg-50mm-poroshel.m	Ginkgo.m	Success	Ginkgo-8	C
Quercetin-like	1	Cpd 1: C15 H10 O7	C15 H10 O7	C15 H10 O7	391667	Find By Formula	9160330	301.036	1	G9A-neg.d	7.193	C15 H10 O7	2238953	FBF	FBF	4	Negative	1	1	302.043	99.75	301.036	7.102	7.027	0.166	0.12	C15 H10 O7	0.41	99.75	Pass	302.043	G9A-neg	Sample	Instrument 1	P1-C7	Metabol1_MS-neg-50mm-poroshel.m	Ginkgo.m	Success	Ginkgo-9	A
Quercetrin-like	2	Cpd 2: C21 H20 O11	C21 H20 O11	C21 H20 O11	30494	Find By Formula	641740	447.093	1	G9A-neg.d	5.991	C21 H20 O11	167127	FBF	FBF	5	Negative	1	1	448.101	99.82	447.093	5.949	5.858	0.133	-0.03	C21 H20 O11	-0.06	99.82	Pass	448.101	G9A-neg	Sample	Instrument 1	P1-C7	Metabol1_MS-neg-50mm-poroshel.m	Ginkgo.m	Success	Ginkgo-9	A
Quercetrin-like	3	Cpd 3: C21 H20 O11	C21 H20 O11	C21 H20 O11	5040	Find By Formula	44399	755.183	1	G9A-neg.d	6.273	C21 H20 O11	27186	FBF	FBF	4	Negative	1	1	448.1	94.15	447.093	6.215	6.19	0.083	-0.31	C21 H20 O11	-0.7	94.15	Pass	448.101	G9A-neg	Sample	Instrument 1	P1-C7	Metabol1_MS-neg-50mm-poroshel.m	Ginkgo.m	Success	Ginkgo-9	A
Quercetrin-like	4	Cpd 4: C21 H20 O11	C21 H20 O11	C21 H20 O11	2491	Find By Formula	47521	287.056	1	G9A-neg.d	6.439	C21 H20 O11	16962	FBF	FBF	3	Negative	1	1	448.1	97.46	447.093	6.389	6.339	0.1	-0.3	C21 H20 O11	-0.67	97.46	Pass	448.101	G9A-neg	Sample	Instrument 1	P1-C7	Metabol1_MS-neg-50mm-poroshel.m	Ginkgo.m	Success	Ginkgo-9	A
Kaempferol-like	5	Cpd 5: C15 H10 O6	C15 H10 O6	C15 H10 O6	1630159	Find By Formula	29121755	285.041	1	G9A-neg.d	7.931	C15 H10 O6	7946078	FBF	FBF	4	Negative	1	1	286.048	98.82	285.041	7.857	7.799	0.133	0.17	C15 H10 O6	0.6	98.82	Pass	286.048	G9A-neg	Sample	Instrument 1	P1-C7	Metabol1_MS-neg-50mm-poroshel.m	Ginkgo.m	Success	Ginkgo-9	A
Isorhamnetin-like	6	Cpd 6: C16 H12 O7	C16 H12 O7	C16 H12 O7	176208	Find By Formula	5072648	315.051	1	G9A-neg.d	8.081	C16 H12 O7	1317376	FBF	FBF	4	Negative	1	1	316.058	99.82	315.051	7.973	7.865	0.216	0.13	C16 H12 O7	0.41	99.82	Pass	316.058	G9A-neg	Sample	Instrument 1	P1-C7	Metabol1_MS-neg-50mm-poroshel.m	Ginkgo.m	Success	Ginkgo-9	A
Quercetin-3-beta-glucoside-like	7	Cpd 7: C21 H20 O12	C21 H20 O12	C21 H20 O12	41326	Find By Formula	846316	441.082	1	G9A-neg.d	5.642	C21 H20 O12	283439	FBF	FBF	4	Negative	1	1	464.095	99.7	463.088	5.576	5.493	0.149	-0.33	C21 H20 O12	-0.71	99.7	Pass	464.096	G9A-neg	Sample	Instrument 1	P1-C7	Metabol1_MS-neg-50mm-poroshel.m	Ginkgo.m	Success	Ginkgo-9	A
Quercetin-3-beta-glucoside-like	8	Cpd 8: C21 H20 O12	C21 H20 O12	C21 H20 O12	2794	Find By Formula	43913	593.152	1	G9A-neg.d	5.783	C21 H20 O12	18077	FBF	FBF	3	Negative	1	1	464.095	95.42	463.088	5.742	5.701	0.083	-0.14	C21 H20 O12	-0.3	95.42	Pass	464.096	G9A-neg	Sample	Instrument 1	P1-C7	Metabol1_MS-neg-50mm-poroshel.m	Ginkgo.m	Success	Ginkgo-9	A
Rutin-like	9	Cpd 9: C27 H30 O16	C27 H30 O16	C27 H30 O16	47967	Find By Formula	546809	609.146	1	G9A-neg.d	0.633	C27 H30 O16	224081	FBF	FBF	4	Negative	1	1	610.154	98.87	609.146	0.6	0.567	0.066	0.35	C27 H30 O16	0.58	98.87	Pass	610.153	G9A-neg	Sample	Instrument 1	P1-C7	Metabol1_MS-neg-50mm-poroshel.m	Ginkgo.m	Success	Ginkgo-9	A
Rutin-like	10	Cpd 10: C27 H30 O16	C27 H30 O16	C27 H30 O16	64582	Find By Formula	716891	133.015	1	G9A-neg.d	0.75	C27 H30 O16	343102	FBF	FBF	4	Negative	1	1	610.154	98.96	609.147	0.667	0.633	0.116	0.5	C27 H30 O16	0.81	98.96	Pass	610.153	G9A-neg	Sample	Instrument 1	P1-C7	Metabol1_MS-neg-50mm-poroshel.m	Ginkgo.m	Success	Ginkgo-9	A
Rutin-like	11	Cpd 11: C27 H30 O16	C27 H30 O16	C27 H30 O16	36756	Find By Formula	706761	593.152	1	G9A-neg.d	5.75	C27 H30 O16	294330	FBF	FBF	4	Negative	1	1	610.154	99.78	609.146	5.684	5.642	0.108	0.1	C27 H30 O16	0.16	99.78	Pass	610.153	G9A-neg	Sample	Instrument 1	P1-C7	Metabol1_MS-neg-50mm-poroshel.m	Ginkgo.m	Success	Ginkgo-9	A
Ginkgolide A like	12	Cpd 12: C20 H24 O9	C20 H24 O9	C20 H24 O9	6785	Find By Formula	90910	423.13	1	G9A-neg.d	7.077	C20 H24 O9	32379	FBF	FBF	3	Negative	1	1	408.142	92.36	407.135	7.027	6.978	0.1	0.04	C20 H24 O9	0.09	92.36	Pass	408.142	G9A-neg	Sample	Instrument 1	P1-C7	Metabol1_MS-neg-50mm-poroshel.m	Ginkgo.m	Success	Ginkgo-9	A
Ginkgolide A like	13	Cpd 13: C20 H24 O9	C20 H24 O9	C20 H24 O9	6785	Find By Formula	90910	423.13	1	G9A-neg.d	7.077	C20 H24 O9	32379	FBF	FBF	3	Negative	1	1	408.142	92.36	407.135	7.027	6.978	0.1	0.04	C20 H24 O9	0.09	92.36	Pass	408.142	G9A-neg	Sample	Instrument 1	P1-C7	Metabol1_MS-neg-50mm-poroshel.m	Ginkgo.m	Success	Ginkgo-9	A
Ginkgolide B like	14	Cpd 14: C20 H24 O10	C20 H24 O10	C20 H24 O10	74399	Find By Formula	1736547	453.14	1	G9A-neg.d	7.094	C20 H24 O10	477300	FBF	FBF	5	Negative	1	1	424.137	99.84	423.13	7.011	6.92	0.174	-0.15	C20 H24 O10	-0.36	99.84	Pass	424.137	G9A-neg	Sample	Instrument 1	P1-C7	Metabol1_MS-neg-50mm-poroshel.m	Ginkgo.m	Success	Ginkgo-9	A
Ginkgolide C like	15	Cpd 15: C20 H24 O11	C20 H24 O11	C20 H24 O11	39297	Find By Formula	931387	623.163	1	G9A-neg.d	5.883	C20 H24 O11	288951	FBF	FBF	4	Negative	1	1	440.132	99.07	439.125	5.8	5.709	0.174	0.04	C20 H24 O11	0.09	99.07	Pass	440.132	G9A-neg	Sample	Instrument 1	P1-C7	Metabol1_MS-neg-50mm-poroshel.m	Ginkgo.m	Success	Ginkgo-9	A
Bilobalide-like	16	Cpd 16: C15 H18 O8	C15 H18 O8	C15 H18 O8	4858	Find By Formula	81697	441.083	1	G9A-neg.d	5.667	C15 H18 O8	23537	FBF	FBF	3	Negative	1	1	326.1	92.77	325.092	5.642	5.568	0.1	-0.55	C15 H18 O8	-1.68	92.77	Pass	326.1	G9A-neg	Sample	Instrument 1	P1-C7	Metabol1_MS-neg-50mm-poroshel.m	Ginkgo.m	Success	Ginkgo-9	A
Bilobalide-like	17	Cpd 17: C15 H18 O8	C15 H18 O8	C15 H18 O8	54758	Find By Formula	1019657	623.162	1	G9A-neg.d	5.85	C15 H18 O8	271582	FBF	FBF	4	Negative	1	1	326.1	99.94	325.093	5.775	5.701	0.149	-0.03	C15 H18 O8	-0.11	99.94	Pass	326.1	G9A-neg	Sample	Instrument 1	P1-C7	Metabol1_MS-neg-50mm-poroshel.m	Ginkgo.m	Success	Ginkgo-9	A
Bilobalide-like	18	Cpd 18: C15 H18 O8	C15 H18 O8	C15 H18 O8	2770	Find By Formula	58331	301.036	1	G9A-neg.d	7.135	C15 H18 O8	18923	FBF	FBF	3	Negative	1	1	326.1	99.03	325.093	7.086	7.019	0.116	0.08	C15 H18 O8	0.24	99.03	Pass	326.1	G9A-neg	Sample	Instrument 1	P1-C7	Metabol1_MS-neg-50mm-poroshel.m	Ginkgo.m	Success	Ginkgo-9	A
Quercetin-like	1	Cpd 1: C15 H10 O7	C15 H10 O7	C15 H10 O7	426661	Find By Formula	9674271	301.036	1	G9B-neg.d	7.203	C15 H10 O7	2385485	FBF	FBF	4	Negative	1	1	302.043	99.6	301.036	7.112	7.029	0.174	0.24	C15 H10 O7	0.8	99.6	Pass	302.043	G9B-neg	Sample	Instrument 1	P1-C8	Metabol1_MS-neg-50mm-poroshel.m	Ginkgo.m	Success	Ginkgo-9	B
Quercetrin-like	2	Cpd 2: C21 H20 O11	C21 H20 O11	C21 H20 O11	40043	Find By Formula	682874	447.094	1	G9B-neg.d	5.984	C21 H20 O11	198803	FBF	FBF	4	Negative	1	1	448.101	99.46	447.094	5.942	5.868	0.116	0.14	C21 H20 O11	0.32	99.46	Pass	448.101	G9B-neg	Sample	Instrument 1	P1-C8	Metabol1_MS-neg-50mm-poroshel.m	Ginkgo.m	Success	Ginkgo-9	B
Quercetrin-like	3	Cpd 3: C21 H20 O11	C21 H20 O11	C21 H20 O11	5500	Find By Formula	56217	755.183	1	G9B-neg.d	6.274	C21 H20 O11	29417	FBF	FBF	4	Negative	1	1	448.101	93.37	447.093	6.216	6.183	0.091	0.04	C21 H20 O11	0.08	93.37	Pass	448.101	G9B-neg	Sample	Instrument 1	P1-C8	Metabol1_MS-neg-50mm-poroshel.m	Ginkgo.m	Success	Ginkgo-9	B
Quercetrin-like	4	Cpd 4: C21 H20 O11	C21 H20 O11	C21 H20 O11	3168	Find By Formula	61935	287.056	1	G9B-neg.d	6.423	C21 H20 O11	25182	FBF	FBF	3	Negative	1	1	448.101	97.25	447.094	6.382	6.315	0.108	0.21	C21 H20 O11	0.47	97.25	Pass	448.101	G9B-neg	Sample	Instrument 1	P1-C8	Metabol1_MS-neg-50mm-poroshel.m	Ginkgo.m	Success	Ginkgo-9	B
Kaempferol-like	5	Cpd 5: C15 H10 O6	C15 H10 O6	C15 H10 O6	1773515	Find By Formula	29396865	285.041	1	G9B-neg.d	7.933	C15 H10 O6	7998070	FBF	FBF	4	Negative	1	1	286.048	98.7	285.041	7.858	7.808	0.124	0.34	C15 H10 O6	1.17	98.7	Pass	286.048	G9B-neg	Sample	Instrument 1	P1-C8	Metabol1_MS-neg-50mm-poroshel.m	Ginkgo.m	Success	Ginkgo-9	B
Isorhamnetin-like	6	Cpd 6: C16 H12 O7	C16 H12 O7	C16 H12 O7	216618	Find By Formula	6156997	315.051	1	G9B-neg.d	8.098	C16 H12 O7	1528373	FBF	FBF	5	Negative	1	1	316.058	99.69	315.051	7.974	7.866	0.232	0.09	C16 H12 O7	0.28	99.69	Pass	316.058	G9B-neg	Sample	Instrument 1	P1-C8	Metabol1_MS-neg-50mm-poroshel.m	Ginkgo.m	Success	Ginkgo-9	B
Quercetin-3-beta-glucoside-like	7	Cpd 7: C21 H20 O12	C21 H20 O12	C21 H20 O12	55558	Find By Formula	776088	441.083	1	G9B-neg.d	5.635	C21 H20 O12	302547	FBF	FBF	4	Negative	1	1	464.095	99.46	463.088	5.569	5.519	0.116	-0.23	C21 H20 O12	-0.5	99.46	Pass	464.096	G9B-neg	Sample	Instrument 1	P1-C8	Metabol1_MS-neg-50mm-poroshel.m	Ginkgo.m	Success	Ginkgo-9	B
Quercetin-3-beta-glucoside-like	8	Cpd 8: C21 H20 O12	C21 H20 O12	C21 H20 O12	2809	Find By Formula	45355	623.163	1	G9B-neg.d	5.793	C21 H20 O12	17387	FBF	FBF	4	Negative	1	1	464.096	95.27	463.089	5.743	5.71	0.083	0.26	C21 H20 O12	0.57	95.27	Pass	464.096	G9B-neg	Sample	Instrument 1	P1-C8	Metabol1_MS-neg-50mm-poroshel.m	Ginkgo.m	Success	Ginkgo-9	B
Rutin-like	9	Cpd 9: C27 H30 O16	C27 H30 O16	C27 H30 O16	38813	Find By Formula	361905	609.146	1	G9B-neg.d	0.626	C27 H30 O16	188194	FBF	FBF	4	Negative	1	1	610.153	99.5	609.146	0.601	0.577	0.05	-0.19	C27 H30 O16	-0.31	99.5	Pass	610.153	G9B-neg	Sample	Instrument 1	P1-C8	Metabol1_MS-neg-50mm-poroshel.m	Ginkgo.m	Success	Ginkgo-9	B
Rutin-like	10	Cpd 10: C27 H30 O16	C27 H30 O16	C27 H30 O16	41154	Find By Formula	346442	133.014	1	G9B-neg.d	0.709	C27 H30 O16	190430	FBF	FBF	4	Negative	1	1	610.153	98.84	609.146	0.668	0.635	0.075	-0.14	C27 H30 O16	-0.24	98.84	Pass	610.153	G9B-neg	Sample	Instrument 1	P1-C8	Metabol1_MS-neg-50mm-poroshel.m	Ginkgo.m	Success	Ginkgo-9	B
Rutin-like	11	Cpd 11: C27 H30 O16	C27 H30 O16	C27 H30 O16	34153	Find By Formula	855852	593.151	1	G9B-neg.d	5.735	C27 H30 O16	343174	FBF	FBF	4	Negative	1	1	610.153	99.76	609.146	5.677	5.627	0.108	0	C27 H30 O16	0	99.76	Pass	610.153	G9B-neg	Sample	Instrument 1	P1-C8	Metabol1_MS-neg-50mm-poroshel.m	Ginkgo.m	Success	Ginkgo-9	B
Ginkgolide A like	12	Cpd 12: C20 H24 O9	C20 H24 O9	C20 H24 O9	7543	Find By Formula	104809	423.13	1	G9B-neg.d	7.087	C20 H24 O9	35032	FBF	FBF	3	Negative	1	1	408.142	98.01	407.135	7.012	6.971	0.116	-0.09	C20 H24 O9	-0.22	98.01	Pass	408.142	G9B-neg	Sample	Instrument 1	P1-C8	Metabol1_MS-neg-50mm-poroshel.m	Ginkgo.m	Success	Ginkgo-9	B
Ginkgolide A like	13	Cpd 13: C20 H24 O9	C20 H24 O9	C20 H24 O9	7543	Find By Formula	104809	423.13	1	G9B-neg.d	7.087	C20 H24 O9	35032	FBF	FBF	3	Negative	1	1	408.142	98.01	407.135	7.012	6.971	0.116	-0.09	C20 H24 O9	-0.22	98.01	Pass	408.142	G9B-neg	Sample	Instrument 1	P1-C8	Metabol1_MS-neg-50mm-poroshel.m	Ginkgo.m	Success	Ginkgo-9	B
Ginkgolide B like	14	Cpd 14: C20 H24 O10	C20 H24 O10	C20 H24 O10	81743	Find By Formula	2226802	423.13	1	G9B-neg.d	7.095	C20 H24 O10	592466	FBF	FBF	5	Negative	1	1	424.137	99.66	423.13	7.02	6.904	0.191	0.11	C20 H24 O10	0.25	99.66	Pass	424.137	G9B-neg	Sample	Instrument 1	P1-C8	Metabol1_MS-neg-50mm-poroshel.m	Ginkgo.m	Success	Ginkgo-9	B
Ginkgolide C like	15	Cpd 15: C20 H24 O11	C20 H24 O11	C20 H24 O11	42622	Find By Formula	1053429	623.163	1	G9B-neg.d	5.868	C20 H24 O11	340823	FBF	FBF	4	Negative	1	1	440.132	98.26	439.125	5.801	5.718	0.149	-0.04	C20 H24 O11	-0.09	98.26	Pass	440.132	G9B-neg	Sample	Instrument 1	P1-C8	Metabol1_MS-neg-50mm-poroshel.m	Ginkgo.m	Success	Ginkgo-9	B
Bilobalide-like	16	Cpd 16: C15 H18 O8	C15 H18 O8	C15 H18 O8	5604	Find By Formula	51183	325.092	1	G9B-neg.d	4.317	C15 H18 O8	19636	FBF	FBF	3	Negative	1	1	326.1	96.46	325.092	4.267	4.242	0.075	-0.53	C15 H18 O8	-1.62	96.46	Pass	326.1	G9B-neg	Sample	Instrument 1	P1-C8	Metabol1_MS-neg-50mm-poroshel.m	Ginkgo.m	Success	Ginkgo-9	B
Bilobalide-like	17	Cpd 17: C15 H18 O8	C15 H18 O8	C15 H18 O8	59009	Find By Formula	1019142	623.163	1	G9B-neg.d	5.859	C15 H18 O8	282671	FBF	FBF	4	Negative	1	1	326.1	99.68	325.093	5.768	5.702	0.158	0.06	C15 H18 O8	0.17	99.68	Pass	326.1	G9B-neg	Sample	Instrument 1	P1-C8	Metabol1_MS-neg-50mm-poroshel.m	Ginkgo.m	Success	Ginkgo-9	B
Quercetin-like	1	Cpd 1: C15 H10 O7	C15 H10 O7	C15 H10 O7	411013	Find By Formula	8891106	301.035	1	G9C-neg.d	7.189	C15 H10 O7	2237842	FBF	FBF	4	Negative	1	1	302.043	99.72	301.035	7.106	7.032	0.158	-0.16	C15 H10 O7	-0.54	99.72	Pass	302.043	G9C-neg	Sample	Instrument 1	P1-C9	Metabol1_MS-neg-50mm-poroshel.m	Ginkgo.m	Success	Ginkgo-9	C
Quercetrin-like	2	Cpd 2: C21 H20 O11	C21 H20 O11	C21 H20 O11	33004	Find By Formula	624660	431.098	1	G9C-neg.d	5.987	C21 H20 O11	182720	FBF	FBF	4	Negative	1	1	448.1	99.3	447.093	5.937	5.862	0.124	-0.46	C21 H20 O11	-1.02	99.3	Pass	448.101	G9C-neg	Sample	Instrument 1	P1-C9	Metabol1_MS-neg-50mm-poroshel.m	Ginkgo.m	Success	Ginkgo-9	C
Quercetrin-like	3	Cpd 3: C21 H20 O11	C21 H20 O11	C21 H20 O11	4303	Find By Formula	65501	755.183	1	G9C-neg.d	6.285	C21 H20 O11	23526	FBF	FBF	4	Negative	1	1	448.1	95.27	447.093	6.211	6.169	0.116	-0.86	C21 H20 O11	-1.93	95.27	Pass	448.101	G9C-neg	Sample	Instrument 1	P1-C9	Metabol1_MS-neg-50mm-poroshel.m	Ginkgo.m	Success	Ginkgo-9	C
Quercetrin-like	4	Cpd 4: C21 H20 O11	C21 H20 O11	C21 H20 O11	3472	Find By Formula	58361	287.056	1	G9C-neg.d	6.435	C21 H20 O11	22290	FBF	FBF	4	Negative	1	1	448.1	95.42	447.093	6.385	6.335	0.1	-0.73	C21 H20 O11	-1.63	95.42	Pass	448.101	G9C-neg	Sample	Instrument 1	P1-C9	Metabol1_MS-neg-50mm-poroshel.m	Ginkgo.m	Success	Ginkgo-9	C
Kaempferol-like	5	Cpd 5: C15 H10 O6	C15 H10 O6	C15 H10 O6	1613305	Find By Formula	31023563	285.04	1	G9C-neg.d	7.936	C15 H10 O6	8419513	FBF	FBF	4	Negative	1	1	286.048	99.06	285.04	7.861	7.795	0.141	-0.17	C15 H10 O6	-0.59	99.06	Pass	286.048	G9C-neg	Sample	Instrument 1	P1-C9	Metabol1_MS-neg-50mm-poroshel.m	Ginkgo.m	Success	Ginkgo-9	C
Isorhamnetin-like	6	Cpd 6: C16 H12 O7	C16 H12 O7	C16 H12 O7	190545	Find By Formula	5323367	315.051	1	G9C-neg.d	8.101	C16 H12 O7	1321290	FBF	FBF	4	Negative	1	1	316.058	99.35	315.051	7.969	7.861	0.241	-0.34	C16 H12 O7	-1.06	99.35	Pass	316.058	G9C-neg	Sample	Instrument 1	P1-C9	Metabol1_MS-neg-50mm-poroshel.m	Ginkgo.m	Success	Ginkgo-9	C
Quercetin-3-beta-glucoside-like	7	Cpd 7: C21 H20 O12	C21 H20 O12	C21 H20 O12	31943	Find By Formula	1143100	441.082	1	G9C-neg.d	5.655	C21 H20 O12	313114	FBF	FBF	4	Negative	1	1	464.095	99.59	463.088	5.572	5.415	0.24	-0.32	C21 H20 O12	-0.68	99.59	Pass	464.096	G9C-neg	Sample	Instrument 1	P1-C9	Metabol1_MS-neg-50mm-poroshel.m	Ginkgo.m	Success	Ginkgo-9	C
Rutin-like	8	Cpd 8: C27 H30 O16	C27 H30 O16	C27 H30 O16	41004	Find By Formula	486729	609.146	1	G9C-neg.d	0.629	C27 H30 O16	204730	FBF	FBF	4	Negative	1	1	610.153	99.03	609.146	0.596	0.563	0.066	0.01	C27 H30 O16	0.02	99.03	Pass	610.153	G9C-neg	Sample	Instrument 1	P1-C9	Metabol1_MS-neg-50mm-poroshel.m	Ginkgo.m	Success	Ginkgo-9	C
Rutin-like	9	Cpd 9: C27 H30 O16	C27 H30 O16	C27 H30 O16	52801	Find By Formula	575444	609.146	1	G9C-neg.d	0.712	C27 H30 O16	314754	FBF	FBF	4	Negative	1	1	610.153	99.55	609.146	0.671	0.638	0.075	-0.17	C27 H30 O16	-0.29	99.55	Pass	610.153	G9C-neg	Sample	Instrument 1	P1-C9	Metabol1_MS-neg-50mm-poroshel.m	Ginkgo.m	Success	Ginkgo-9	C
Rutin-like	10	Cpd 10: C27 H30 O16	C27 H30 O16	C27 H30 O16	35977	Find By Formula	724811	593.151	1	G9C-neg.d	5.738	C27 H30 O16	285348	FBF	FBF	4	Negative	1	1	610.153	98.88	609.145	5.68	5.638	0.1	-0.6	C27 H30 O16	-0.98	98.88	Pass	610.153	G9C-neg	Sample	Instrument 1	P1-C9	Metabol1_MS-neg-50mm-poroshel.m	Ginkgo.m	Success	Ginkgo-9	C
Ginkgolide A like	11	Cpd 11: C20 H24 O9	C20 H24 O9	C20 H24 O9	5636	Find By Formula	113817	453.14	1	G9C-neg.d	7.073	C20 H24 O9	36176	FBF	FBF	3	Negative	1	1	408.141	96.5	407.134	7.015	6.957	0.116	-0.62	C20 H24 O9	-1.52	96.5	Pass	408.142	G9C-neg	Sample	Instrument 1	P1-C9	Metabol1_MS-neg-50mm-poroshel.m	Ginkgo.m	Success	Ginkgo-9	C
Ginkgolide A like	12	Cpd 12: C20 H24 O9	C20 H24 O9	C20 H24 O9	5636	Find By Formula	113817	453.14	1	G9C-neg.d	7.073	C20 H24 O9	36176	FBF	FBF	3	Negative	1	1	408.141	96.5	407.134	7.015	6.957	0.116	-0.62	C20 H24 O9	-1.52	96.5	Pass	408.142	G9C-neg	Sample	Instrument 1	P1-C9	Metabol1_MS-neg-50mm-poroshel.m	Ginkgo.m	Success	Ginkgo-9	C
Ginkgolide B like	13	Cpd 13: C20 H24 O10	C20 H24 O10	C20 H24 O10	70036	Find By Formula	1708030	453.14	1	G9C-neg.d	7.09	C20 H24 O10	482509	FBF	FBF	5	Negative	1	1	424.136	98.63	423.129	7.023	6.924	0.166	-0.66	C20 H24 O10	-1.55	98.63	Pass	424.137	G9C-neg	Sample	Instrument 1	P1-C9	Metabol1_MS-neg-50mm-poroshel.m	Ginkgo.m	Success	Ginkgo-9	C
Ginkgolide C like	14	Cpd 14: C20 H24 O11	C20 H24 O11	C20 H24 O11	38963	Find By Formula	914350	623.162	1	G9C-neg.d	5.871	C20 H24 O11	286192	FBF	FBF	4	Negative	1	1	440.131	97.72	439.124	5.804	5.713	0.158	-0.65	C20 H24 O11	-1.49	97.72	Pass	440.132	G9C-neg	Sample	Instrument 1	P1-C9	Metabol1_MS-neg-50mm-poroshel.m	Ginkgo.m	Success	Ginkgo-9	C
Bilobalide-like	15	Cpd 15: C15 H18 O8	C15 H18 O8	C15 H18 O8	45948	Find By Formula	1098653	623.162	1	G9C-neg.d	5.846	C15 H18 O8	271077	FBF	FBF	4	Negative	1	1	326.1	99.11	325.092	5.771	5.68	0.166	-0.42	C15 H18 O8	-1.28	99.11	Pass	326.1	G9C-neg	Sample	Instrument 1	P1-C9	Metabol1_MS-neg-50mm-poroshel.m	Ginkgo.m	Success	Ginkgo-9	C
Bilobalide-like	16	Cpd 16: C15 H18 O8	C15 H18 O8	C15 H18 O8	2574	Find By Formula	58586	301.035	1	G9C-neg.d	7.181	C15 H18 O8	17353	FBF	FBF	3	Negative	1	1	326.099	93.95	325.092	7.09	7.04	0.141	-0.89	C15 H18 O8	-2.72	93.95	Pass	326.1	G9C-neg	Sample	Instrument 1	P1-C9	Metabol1_MS-neg-50mm-poroshel.m	Ginkgo.m	Success	Ginkgo-9	C
